1 **Polyploidy and elevation contribute to opposing latitudinal gradients in**  
2 **diversification and species richness in lady ferns (Athyriaceae)**

3

4 Ran Wei<sup>1</sup>, Richard H. Ree<sup>2</sup>, Michael A. Sundue<sup>3</sup> and Xian-Chun Zhang<sup>1</sup>

5

6 <sup>1</sup>State Key Laboratory of Systematic and Evolutionary Botany, Institute of Botany,  
7 the Chinese Academy of Sciences, Beijing 100093, China; <sup>2</sup>Life Sciences Section,  
8 Integrative Research Center, The Field Museum, Chicago, IL 60605, USA; <sup>3</sup>The  
9 Pringle Herbarium, University of Vermont, 27 Colchester Drive, Burlington, VT  
10 05405, USA

11

12 Author for correspondence:

13 *Ran Wei*

14 *Tel: +86 10 62836479*

15 *Email: weiran@ibcas.ac.cn*

16

17 Short running head: Diversification of *Athyrium* and *Diplazium*

18

19 Number of words in the main text: 4563;

20 Number of words in Introduction: 885;

21 Number of words in Materials & Methods: 1513;

22 Number of words in Results: 645;

23 Number of words in Discussion: 1423;

24 Number of words in Acknowledgements: 97;

25 Number of figures: 4 (3 are in color);

26 Number of tables: 2;

27 Number of supporting information: Five figures and six tables.

28

29

30

31

32

33

34

35 **Summary**

36 • In ferns, the temperate-tropical sister clades *Athyrium* and *Diplazium* present an  
37 opportunity to study a latitudinal contrast in diversification dynamics.

38 • We generated a taxonomically expanded molecular chronogram and used  
39 macroevolutionary models to analyze how diversification rates have changed through  
40 time, across lineages, and in concert with changes in elevation and ploidy. We tested a  
41 novel model of cladogenetic state-change in which polyploidy can arise as an  
42 infraspecific polymorphism, with diversification parameters distinct from those of  
43 pure diploids and polyploids.

44 • Both *Athyrium* and *Diplazium* accelerated their diversification near the Oligocene-  
45 Miocene transition. In *Diplazium*, the rate shift is older, with subsequent net  
46 diversification somewhat slower and suggestive of diversity-dependence. In *Athyrium*,  
47 diversification is faster and associated with higher elevations. In both clades,  
48 polyploids have the highest rate of net accumulation but lowest (negative) net  
49 diversification, while the converse is true for polymorphic species; diploids have low  
50 rates of both net accumulation and diversification.

51 • Diversification in *Athyrium* may have responded to ecological opportunities in  
52 expanding temperate habitats during the Neogene, especially in mountains, while the  
53 pattern in *Diplazium* suggests saturation in the tropics. Neopolyploids are generated  
54 rapidly, primarily through accelerated cladogenesis in polymorphic species, but are  
55 evolutionary dead ends.

56 **Key words:** Athyriaceae, elevation, latitudinal gradient, macro-evolution, SSE  
57 models, polyploidy

58

59

60

61

62

63

64

65

66

67

68

69 **Introduction**

70 How does the tempo (rate) and mode (process) of lineage diversification vary across  
71 latitude? Consideration of this question has largely focused on explaining the  
72 latitudinal gradient in species richness, especially with respect to how temperate-  
73 tropical contrasts in time-integrated area, temperature and metabolic rate, and  
74 ecological opportunity might influence the rate of speciation (reviewed in Schluter,  
75 2015). A general prediction is that, all else being equal, tropical clades should be  
76 older, and/or have higher net diversification, compared to temperate clades (Wiens &  
77 Donoghue, 2004; Mittelbach *et al.*, 2007). In this context, temperate-tropical sister  
78 clades that otherwise share similar ecologies offer opportunities to study the correlates  
79 and potential drivers of diversification across latitudes over a common timescale.

80 One such opportunity presents itself in the lady-fern family Athyriaceae, in which  
81 the primarily temperate genus *Athyrium*, including allied genera, is sister to the  
82 primarily tropical *Diplazium* (Wei *et al.*, 2013, 2018). These clades respectively  
83 include about 220 and 350 species that occur in habitats that range from wet and  
84 shaded streambanks at lower altitudes to dry and open grasslands higher up (Tryon &  
85 Tryon, 1982; Wang *et al.*, 2013). Both clades are more or less globally distributed,  
86 with the majority of species in tropical and temperate Asia (Wang *et al.*, 2013) and  
87 the tropical Andes (Tryon & Tryon, 1982), and each has been the subject of recent  
88 systematic and biogeographic studies (Wei *et al.*, 2013, 2015, 2018). Here, we  
89 generate a more comprehensive dataset for comparative analyses of diversification: in  
90 particular, how the timing, extent, and phylogenetic distribution of rate heterogeneity  
91 differ in these clades, and what this reveal about their responses to potential drivers of  
92 diversification.

93 In considering such drivers, a common theme that emerges from prior studies of  
94 fern diversification is ecological opportunity. Seminal work at broad taxonomic and  
95 deep temporal scales emphasized how fern lineages, particularly epiphytes,  
96 proliferated ‘in the shadow of angiosperms’, i.e. in novel habitats created as the latter  
97 ascended in the late Cretaceous/early Cenozoic (Schneider *et al.*, 2004; Schuettpelz &  
98 Pryer, 2009; but see Testo & Sundue, 2016). More recently, birth–death models fitted  
99 to phylogenies and the fossil record showed evidence for diversity-dependent

100 origination, interpreted as reflecting opportunistic niche-filling, and extinction driven  
101 by environmental change (Lehtonen *et al.*, 2017). For example, in Polypodiaceae,  
102 faster diversification is correlated with changes in elevation, a proxy for habitat type,  
103 suggesting that niche shifts drive lineage proliferation (Sundue *et al.*, 2015). In the  
104 case of *Athyrium-Diplazium*, one might predict that diversification in *Athyrium* was  
105 accelerated by ecological opportunities arising during the expansion of temperate  
106 habitats during the Neogene, compared to *Diplazium*, which might be in the later  
107 stages of diversity-dependent clade growth, reflecting its persistence in more  
108 continuously stable tropical environments. Both clades might show responses to  
109 elevation, reflecting their respective colonization of temperate and tropical mountains,  
110 such as temperate Hengduan Mountains and the tropical Kinabalu and Andes.

111 Another potential driver of diversification that is not directly related to latitude, but  
112 demands attention due to its prevalence in ferns, is polyploidy (e.g. Schneider *et al.*,  
113 2017). There is evidence that more than 50% of the species in the *Athyrium-*  
114 *Diplazium* clade are polyploid (e.g. Praptosuwiryo, 2008; Bir & Verma, 2010). The  
115 effect of polyploidy on plant diversification has received much attention from both  
116 theoretical and empirical perspectives (e.g. Mayrose *et al.*, 2011; Soltis *et al.*, 2016;  
117 reviewed in Vamosi *et al.*, 2018). In particular, polyploid formation as a mode of  
118 speciation motivated the development of cladogenetic state-dependent diversification  
119 models, in which the rate of speciation coincident with state change is parameterized  
120 (Mayrose *et al.*, 2011; Zhan *et al.*, 2016; see also Goldberg & Igić, 2012). These have  
121 since been used to show that neopolyploids tend to be evolutionary 'dead ends'  
122 (Mayrose *et al.*, 2011; Arrigo & Barker, 2012) due to effects such as gene imbalance  
123 of the sex chromosomes during the meiosis (Orr, 1990), increased abortion in  
124 heteroploid hybrids (Ramsey & Schemske, 2002), and inefficiency of selection for  
125 multi-copy genes in polyploids (Wright, 1969). We wish to know if this holds true in  
126 the diversification dynamics of *Athyrium* and *Diplazium*.

127 Previous studies of neopolyploidy using cladogenetic state-change models only  
128 considered two states for species, diploid and polyploid (Zhan *et al.*, 2016). However,  
129 infraspecific variation in ploidy is common in plants (Wood *et al.*, 2009); in the  
130 *Athyrium-Diplazium* clade, 5–10% of species have polyploid individuals recorded  
131 within one or more diploid populations (Walker, 1966; Tryon & Tryon, 1982;  
132 Takamiya *et al.*, 1999, 2000; Takamiya & Ohto, 2001; Praptosuwiryo, 2008; Bir &

133 Verma, 2010). Such cases of polymorphism may represent incipient speciation via  
134 polyploidization. To test this idea, we constructed cladogenetic state-change models  
135 that include three states, diploid, polyploid, and a polymorphic diploid/polyploid state,  
136 with free parameters assigned to the rate at which polymorphic species give rise to  
137 new neopolyploids via cladogenesis events.

138 Our study can be summarized as a temperate-tropical contrast in diversification  
139 dynamics, focusing on how sister clades have responded to common potential drivers  
140 of diversification. Specifically, our aims are to reconstruct a time-scaled global  
141 phylogeny of the *Athyrium-Diplazium* clade, estimate variation in diversification rates  
142 through time, and infer the effects of elevation and polyploidy. Our intent is to shed  
143 light on latitudinal differences in the tempo and mode of diversification, and  
144 contribute to a more general understanding of the latitudinal diversity gradient.

145

## 146 **Materials and Methods**

### 147 **Taxon sampling and molecular data**

148 Our sampling strategy followed the most recent systematic studies of Athyriaceae  
149 (Wei *et al.*, 2013, 2015, 2018; PPG I, 2016). In this study, the circumscription of  
150 *Athyrium* includes four closely related genera (*Anisocampium*, *Athyrium*, *Cornopteris*  
151 and *Pseudathyrium*) and ten sections (sects. *Athyrium*, *Biserrulata*, *Dissitifolia*,  
152 *Mackinnoniana*, *Otophora*, *Polystichoides*, *Rupestria*, *Spinulosa*, *Wallichiana* and  
153 *Yokoscentia*) (Supporting Information Table S1). Since no sectional classification in  
154 the *Diplazium* clade (especially in subgenus *Callipteris*), we tentatively subdivided  
155 *Diplazium* into 11 clades (CHI, DIP, LEP, MET, MON, NEO, PSE, SEA, SIB, SPE  
156 and UNK) according to their morphological similarity, phylogenetic relationship and  
157 biogeographical affinity (Table S1).

158 In total, 85 out of *c.* 220 species of *Athyrium* (39%) and 129 out of *c.* 350 species of  
159 *Diplazium* (37%) on the global scale were sampled, including representatives from all  
160 taxonomic subdivisions or infrageneric groups covering the entire geographical  
161 distribution range and ecological habitats of these two genera. Voucher information is  
162 listed in Table S2. We included 26 representatives from Aspleniaceae, Athyriaceae,  
163 Blechnaceae, Cystopteridaceae, Desmophlebiaceae, Diplaziopsidaceae,  
164 Dryopteridaceae, Hemidictyaceae, Onocleaceae, Rhachidosoraceae, Thelypteridaceae  
165 and Woodsiaceae as outgroups and to provide appropriate nodes for fossil calibrations.

166 We assembled a dataset of eight chloroplast regions (*atpA*, *atpB*, *matK*, *rbcL*,  
167 *rpl32-trnP*, *rps4*, *rps4-trnS*, *trnL-F*) with a total aligned length of 8297 bp. We used  
168 1129 previously published sequences and generated 336 new sequences (Table S2).  
169 DNA extraction, amplification, sequencing, and alignment protocols followed Wei *et*  
170 *al.* (2013, 2018).

171

## 172 **Divergence time estimation**

173 We inferred the posterior distribution of chronograms using BEAST 1.8.4 (Drummond  
174 & Rambaut, 2007) with the alignment partitioned by protein coding regions and  
175 intergenic spacers. Preliminary analyses rejected a strict molecular clock, so we used  
176 the uncorrelated lognormal relaxed clock model with a birth–death prior on tree shape.  
177 Eight independent runs of 30 million generations, sampling every 1000 generations,  
178 were carried out on the Cyberinfrastructure for Phylogenetic Research (CIPRES)  
179 Science Gateway (<http://www.phylo.org>; Miller *et al.*, 2010). The resulting log files  
180 were combined (with the first 50% samples discarded as burn-in) using  
181 LOGCOMBINER 1.8.4 (Drummond & Rambaut, 2007) and checked in TRACER 1.6 to  
182 make sure the effective sampling sizes for most of the relevant estimated parameters  
183 were well above 200. The tree files were resampled from each run using the same  
184 burn-in strategy in LOGCOMBINER. The maximum clade credibility (MCC) topology  
185 with a posterior probability limit of 0.5 and mean branch lengths was summarized  
186 using TREEANNOTATOR 1.8.4 (Drummond & Rambaut, 2007).

187 Four calibration points were used. For the root node the prior was a Normal  
188 distribution with a mean age of 107.29 Myr and a SD of 10 (with 95% highest  
189 posterior density [HPD]: 90.84–123.7 Myr) to cover the range of published split times  
190 from 91 Myr to 125 Myr including the 95% HPD intervals (Schneider *et al.*, 2004;  
191 Schuettpelz & Pryer, 2009; Rothfels *et al.*, 2015; but see Testo & Sundue, 2016). We  
192 used the Paleocene fossil of *Onoclea* (Rothwell & Stockey, 1991) to constrain the  
193 minimum age of the Onocleaceae crown group with a lognormal prior distribution  
194 with an offset of 54.5 Myr and mean of 1.0 (with 95% HPD: 55.02–68.58 Myr). We  
195 used earliest fossil record of *Woodwardia*, known from Paleocene deposits of North  
196 America, to constrain the crown node of Blechnaceae (Collinson, 2001), using the  
197 same prior settings. We assigned the *Diplazium*-like fossil reconstructions  
198 (*Makotopteris princetonensis*, Stockey *et al.*, 1999; *Dickwhitea allenbyensis*, Karafit

199 *et al.*, 2006) found in the Middle Eocene deposits of British Columbia in North  
200 America to the stem lineage of *Diplazium* (Wei *et al.*, 2015), yielding a lognormal  
201 prior with an offset of 36.5 Myr and mean of 2.0 (with 95% HPD: 37.93–74.78 Myr)  
202 for the crown node of the *Athyrium-Diplazium* clade.

203

#### 204 **State-independent diversification analysis**

205 We used Bayesian Analysis of Macroevolutionary Mixtures (BAMM) 2.2.2 (Rabosky,  
206 2014) to estimate rates of speciation ( $\lambda$ ) and extinction ( $\mu$ ) through time and across  
207 clades on the MCC tree, pruned to the ingroup *Athyrium-Diplazium* clade. To account  
208 for incomplete sampling, we estimated the sampling fractions of infrageneric groups  
209 (Table S1) from our own taxonomic knowledge and the literature (e.g. Ching, 1964;  
210 Kato, 1977; Tryon & Tryon, 1982; Hsieh, 1986; Tryon & Stolze, 1991; Zhang, 1992;  
211 Stolze *et al.*, 1994; Wang, 1997; Mickel & Smith, 2004; Y.C. Liu *et al.*, 2011; Wang  
212 *et al.*, 2013; Wei *et al.*, 2013, 2018). Four MCMC analyses were run for 3 million  
213 generations each, sampled every 1000 generations. Each run was checked to ensure  
214 that the effective sample size (ESS) exceeded 200, and the first 10% of samples were  
215 discarded as burn-in. Results were summarized using BAMMTOOLS (Rabosky *et al.*,  
216 2014). To evaluate the best model generated by BAMM (compared with a null model  
217 with no diversification rate shifts), we relied on Bayes Factors calculated with the  
218 COMPUTEBAYESFACTOR function of BAMMTOOLS.

219

#### 220 **State-dependent diversification analyses**

221 We tested two variables for an association with diversification: mean elevation and  
222 ploidy. Data were obtained from a variety of sources, including online databases  
223 (Global Plants, <https://plants.jstor.org>; Tropicos, <http://www.tropicos.org>; IPCN,  
224 <http://www.tropicos.org/Project/PCN>; CCDB,  
225 <http://ccdb.tau.ac.il/Pteridophytes/Athyriaceae>), herbarium specimens, and cytological  
226 reports (e.g. Mehra & Bir, 1960; Walker, 1966, 1973; Tryon & Tryon, 1981;  
227 Takamiya *et al.*, 1999, 2000; Takamiya & Ohta, 2001; Praptosuwiryo, 2008; Bir &  
228 Verma, 2010), and are available in Table S3.

229 To test the hypothesis of net diversification accelerated by divergence in elevation  
230 (Sundue *et al.*, 2015), we used BAMM to estimate the rates of elevation change ( $\beta$ ) at  
231 the tips of the MCC tree, and performed phylogenetic generalized least squares



232 (PGLS) regression of  $\beta$  on tip values of  $r = \lambda - \mu$  using GEIGER (Harmon *et al.*, 2008).  
233 In addition, we tested for a direct effect of elevation using the quantitative-state  
234 speciation-extinction (QuaSSE) model (FitzJohn, 2010). We considered seven  
235 candidate relationships between elevation (log-transformed) and  $\lambda$ : 1)  $\lambda$  is constant  
236 and independent of elevation; 2) linear; 3) sigmoid; 4) unimodal, represented by a  
237 vertically offset Gaussian function; and another three models (linear, sigmoid, and  
238 unimodal) with a directional tendency (Table S4). We ran each model on the entire  
239 ingroup clade as well as separately on *Athyrium* and *Diplazium* using DIVERSITREE  
240 0.9-10 (FitzJohn, 2012). We compared models using the Akaike information criterion  
241 (AIC).

242 To explore the effect of ploidy on diversification we used the cladogenetic state  
243 change speciation-extinction (ClaSSE) model (Goldberg & Igic, 2012). Species were  
244 scored as 1 (polymorphic, i.e. diploid with records of intermingled polyploids), 2  
245 (diploid), 3 (polyploid), or NA (unknown). We considered reports of  $2n = 80$  for  
246 *Athyrium* and  $2n = 82$  for *Diplazium* as diploid. All other species data were multiples  
247 of these numbers (e.g.  $2n = 160$ ,  $2n = 123$ ,  $2n = 164$ ,  $2n = 205$ ,  $2n = 246$ ,  $2n = 328$ )  
248 and were thus scored as polyploids (Table S3). We constructed a variety of models  
249 with up to seven cladogenetic rates, denoted as a triplet of values for the ancestral and  
250 descendant states:  $\lambda_{111}$ ,  $\lambda_{112}$ ,  $\lambda_{113}$ ,  $\lambda_{123}$ ,  $\lambda_{222}$ ,  $\lambda_{223}$ ,  $\lambda_{333}$ , three extinction rates ( $\mu_1$ ,  $\mu_2$ ,  $\mu_3$ ),  
251 and four transition rates ( $q_{12}$ ,  $q_{13}$ ,  $q_{21}$ ,  $q_{23}$ ) (Fig. 1). We disallowed anagenetic change  
252 from polyploidy (3) to diploidy (1, 2) because no diploidization events were reported  
253 according to previous cytological studies and our CHROMEVOLE analysis (see results).  
254 After some preliminary analyses, we settled on six candidate models: 1) a full model  
255 with all 13 free parameters; 2) a null model with three parameters, in which  
256 diversification is state-independent and anagenetic change is symmetric; 3) a  
257 ‘cladogenetic’ model with 11 parameters and a single rate of anagenetic change; 4) an  
258 ‘anagenetic’ model with five parameters and a single rate for all speciation and  
259 extinction events; 5) an ‘extinction’ model with five parameters and 1 rate each for  
260 speciation and anagenetic change; and 6) a ‘cladogenetic-anagenetic’ model with 11  
261 parameters, and a single rate for extinction (Fig. 1; Table S5). Models were run on the  
262 whole ingroup clade and separately on each genus, and compared using AIC.  
263 Parameters of the best-fit models were estimated using MCMC for 100,000  
264 generations in DIVERSITREE.



265 To test the reliability of our ClaSSE analysis given that nearly 40% of the sampled  
266 species have unknown ploidy, we simulated 100 trees of the same size as our ingroup  
267 clade using the maximum likelihood parameter values of the best-fit model. For each  
268 tree we ‘impoverished’ the tip states by randomly setting 40% to the unknown state,  
269 NA, and performed model selection using the candidate pool as described above. We  
270 also compared the parameters estimated from the impoverished data to their  
271 simulation values. All procedures were carried out using DIVERSITREE 0.9-10.

272

### 273 **Reconstruction of polyploidy evolution**

274 To infer the evolutionary history of polyploidy along the phylogeny, we carried out  
275 an ancestral state reconstruction using CHROMEVOLE 2.0 (Glick & Mayrose, 2014)  
276 implemented in RASP 4.0 (Yu *et al.*, 2015). To shorten the calculation time, we used  
277 the ‘Auto\_run’ option, which automatically optimized all the parameters for  
278 chromosome evolution models, including rates of single ascending dysploidy ( $\gamma$ ),  
279 descending dysploidy ( $\delta$ ), whole-genome duplication ( $\rho$ ) and demi-polyploidy ( $\mu_d$ ).  
280 After model optimization, 10,000 simulations were performed using both maximum  
281 likelihood and Bayesian approaches to summarize the final reconstruction result.

282

## 283 **Results**

### 284 **Divergence time estimation**

285 Our molecular dating analysis yielded age estimates that are broadly congruent with  
286 those of previous studies with the variations less than 10 Myr (Schneider *et al.*, 2004;  
287 Schuettpeitz & Pryer, 2009; Rothfels *et al.*, 2015; Wei *et al.*, 2015; but see Testo &  
288 Sundue, 2016 using a different strategy of divergence time estimation based on a time  
289 calibrated phylogeny) (Fig. S1). Those that differed tended to be older (e.g. the crown  
290 node of the *Diplazium* clade, 47.9 Myr [95% HPD: 41.1–59.4 Myr] in the present  
291 study; 41.7 Myr [95% HPD: 33.6–49 Myr] in Wei *et al.*, 2015). This could be due, at  
292 least in part, to our much denser sampling of *Athyrium* and *Diplazium* (214 species  
293 versus 92 in Wei *et al.*, 2015).

294

### 295 **Diversification analyses: BAMM, QuaSSE and ClaSSE**

296 The BAMM analysis indicated significant increases in net diversification rate in both  
297 *Athyrium* and *Diplazium* (Figs 2a and S2; Table S6). In *Athyrium*, two shifts were

298 inferred at 16.86 Myr and 5.02 Myr, with the latter leading to a rate 17 times higher  
299 than the root rate (0.044–0.76 events Myr<sup>-1</sup> per lineage; Fig. 2a). In *Diplazium* one  
300 shift was inferred at 23.43 Myr (Fig. 2a). Rates-through-time (RTT) plots revealed  
301 contrasting diversification dynamics between *Athyrium* and *Diplazium* following their  
302 initial shifts (Fig. 2b). In *Athyrium*, the net diversification rate increased continuously,  
303 while in *Diplazium* the rate plateaued to a level about half that of *Athyrium* at the  
304 present.

305 Diversification is associated with elevation itself but not its evolutionary rate. The  
306 PGLS regression of the rate of change in elevation on net diversification was  
307 nonsignificant ( $r^2 = 0.286$ ,  $P = 0.379$ ). By contrast, the best-fit QuaSSE model ( $w_i =$   
308 0.88; Table S4) for the *Athyrium-Diplazium* clade included a unimodal relationship  
309 between  $\lambda$  and elevation, with  $\lambda$  highest between 1440 m to 3500 m and constant  $\mu$   
310 (Fig. 2a). There was a negative directional tendency in *Athyrium* (-0.091) and the  
311 entire ingroup clade (-0.086), but a relatively low negative directional tendency in  
312 *Diplazium* (-0.0013) (Table 1). Separate analyses of *Athyrium* and *Diplazium* showed  
313 differences in their unimodal curves for  $\lambda$ . In *Diplazium* the peak is at a lower rate and  
314 elevation, and the curve closely matches the frequency distribution of species by  
315 elevation, while in *Athyrium* the peak is higher in rate and elevation, and the curve is  
316 shifted right relative to the species' frequency distribution (Fig. 3). The best-fit model  
317 for *Athyrium* includes a negatively valued directional tendency parameter, but the one  
318 for *Diplazium* does not (Table 1).

319 Our ClaSSE analyses yielded strong support for ploidy-dependent diversification  
320 dynamics. The 'cladogenetic' model, with 10 free parameters for speciation and  
321 extinction but no differences in  $q$  was selected by AIC (Fig. 4a,b,c,d; Table 2). With  
322 this model, rates of speciation in polyploid ( $\lambda_3 = 0.7054$  events Myr<sup>-1</sup> per lineage) and  
323 polymorphic species ( $\lambda_1 = 1.388$  events Myr<sup>-1</sup> per lineage) exceed rates for diploids  
324 ( $\lambda_2 = 0.1993$  events Myr<sup>-1</sup> per lineage), with the total rate being highest for  
325 polymorphic species (Fig. 4a,d; Table 2). Extinction rates are low for diploid and  
326 polymorphic species but high for polyploids (Fig. 4c); as a result, the net  
327 diversification rate of the polymorphic state is the highest, the rate for diploids is  
328 lower but positive, and the rate for polyploids is lowest and slightly negative (Fig. 4e).  
329 However, the net accumulation rate of polyploids is highest, followed by diploids and  
330 polymorphic species (Fig. 4f). In our simulation analysis of the effect of missing data

331 on model selection, 93% of replicates recovered the correct cladogenetic model (Fig.  
332 S3; Table S7), indicating that in this case, model selection is not obviously biased by  
333 40% missing data.

334 Our CHROMEVOL analysis inferred no dysploidization or diploidization events, and  
335 at least 15 polyploidization events indicating that all polyploid species in *Athyrium*  
336 and *Diplazium* are neopolyploids (Fig. S4).

337

## 338 **Discussion**

### 339 **Latitudinal contrasts in diversification between temperate *Athyrium* and tropical** 340 ***Diplazium***

341 Our dated phylogeny and BAMM analysis showed that species diversity in the  
342 primarily temperate genus *Athyrium* has accumulated relatively recently, with an  
343 increasing net rate through the Neogene, compared to its primarily tropical sister  
344 clade *Diplazium*, which showed dynamics more suggestive of diversity-dependence.  
345 Similar temperate-tropical rate contrasts that run counter to the latitudinal diversity  
346 gradient have been found in fishes, birds, mammals, and seed plants (Weir & Schluter,  
347 2007; Schluter, 2015; Spriggs *et al.*, 2015), and contradict the hypothesis that higher  
348 diversity in the tropics is the result of faster per-lineage diversification (e.g.  
349 Mittelbach *et al.*, 2007). The *Athyrium-Diplazium* contrast may reflect how  
350 diversification has responded at a coarse scale to waxing and waning ecological  
351 opportunities in temperate and tropical habitats, respectively. In this view, the  
352 relatively recent and rapid radiation in *Athyrium* was driven by increasing niche  
353 availability in expanding temperate habitats, while for *Diplazium*, the contraction of  
354 tropical forests had the opposite effect, as global cooling began in the Late Oligocene  
355 (Zachos *et al.*, 2001; Morley, 2003). The plateau of net diversification rate in  
356 *Diplazium* suggests that the clade is closer to ecological saturation than *Athyrium*, in  
357 which the upward trend in rate suggests a clade in the early stages of rapid growth,  
358 further from equilibrium (Fig. 2b). These dynamics are consistent with the idea that  
359 species diversity is predicted by area, and other proxies for carrying capacity,  
360 integrated over time (Fine & Ree, 2006; Jetz & Fine, 2012). In addition, the relatively  
361 high turnover rate  $\mu/\lambda$  in *Athyrium* (Fig. S5) may be due to more severe climatic  
362 oscillations in the temperate zone than in the comparatively stable tropics over the  
363 past 20 Myr or so (Tiffney & Manchester, 2001; Morley, 2003), consistent with the

364 latitudinal gradient in turnover found in previous studies (Jablonski *et al.*, 2006; Weir  
365 & Schluter, 2007; but see Rabosky *et al.*, 2015). This high rate of species turnover, in  
366 turn, suggests a rapid species replacement through non-adaptive evolution in  
367 *Athyrium* (Rundell & Price, 2009).

368 Additional support for the idea that diversification dynamics in *Diplazium* are  
369 closer to an equilibrium state than *Athyrium* is provided by our QuaSSE analysis of  
370 elevation. In *Diplazium* the inferred response of speciation rate to elevation closely  
371 matches the frequency distribution of species along elevation (also is reflected by a  
372 low negative directional tendency; Table 1), suggesting a stable state, while in  
373 *Athyrium* the rate curve is right-shifted: speciation is fastest at elevations higher than  
374 the peak of species richness (Fig. 3). The relative lack of high-elevation species of  
375 *Athyrium* could be explained partly by the inferred negative directional tendency in  
376 the model – i.e. species originated at high elevations but evolved anagenetically  
377 toward lower elevations – but it seems more plausible that *Athyrium* has simply  
378 colonized mountains too recently for the number of high-elevation species to reach  
379 equilibrium. We would expect such a lag time to be lengthened by the relatively high  
380 extinction rate inferred for *Athyrium* versus *Diplazium* (Table 1).

381 Our analyses of elevation stand in contrast to those in the epiphytic fern family  
382 Polypodiaceae, in which faster diversification was positively correlated with the rate  
383 of change in elevation, not elevation itself, suggesting a process of adaptive  
384 divergence and niche-filling along elevation gradients (Sundue *et al.*, 2015). We were  
385 unable to replicate this result from our data, possibly because of insufficiently dense  
386 taxon sampling. Nevertheless, our results suggest that diversification is accelerated by  
387 occurring in mountains, especially for *Athyrium*. However, it is worth noting that even  
388 within *Diplazium*, the highest net diversification was inferred in the lone Andean  
389 clade (Fig. 2a). Left open are questions about how and why, such as to what degree is  
390 speciation accelerated by non-adaptive processes (such as allopatric genetic drift)  
391 versus those involving adaptation? More focused studies of possible mechanisms are  
392 needed. One might look for interactions between traits with environmental tolerances  
393 and mountain buildings in tropical and temperate zones (Xing & Ree, 2017; Hughes  
394 & Atchison, 2015). This has been shown in studies of other plant groups have found  
395 that the evolution of traits such as growth form, leaf size, pollination syndromes, and  
396 metabolic pathways may be linked to faster diversification in mountains where

397 seasonally cold and arid habitats are dominant (Arakaki *et al.*, 2011; Drummond *et al.*,  
398 2012; Roquet *et al.*, 2013; Schwery *et al.*, 2015; Lagomarsino *et al.*, 2016).

399

#### 400 **Polyploidy-driven diversification in the *Athyrium-Diplazium* clade**

401 In ferns, several traits, including growth habit, leaf size, leaf morphology and  
402 gametophyte morphology, have been studied for their effect on diversification  
403 (Sundue *et al.*, 2015; Ramírez-Barahona *et al.*, 2016; Testo & Sundue, 2018), but  
404 polyploidy, despite its ubiquity and precedent in being implicated in diversification  
405 (Wood *et al.*, 2009), has thus far escaped intensive quantitative analysis. While the  
406 macroevolutionary consequences of polyploidy remain a subject of debate (e.g.  
407 Mayrose *et al.*, 2011, 2015; Zhan *et al.*, 2014; Soltis *et al.*, 2014), our inference of  
408 rapid turnover with negative net diversification in polyploids (Fig. 3d) is consistent  
409 with the ‘extinction-risk’ hypothesis, that neopolyploids suffer deleterious genetic  
410 effects (Wright, 1969; Orr, 1990; Ramsey & Schemske, 2002), and thus are often  
411 evolutionary dead ends (Mayrose *et al.*, 2011; Arrigo & Baker, 2012). This effect is  
412 counterbalanced by the high net diversification rate of polymorphic species (Fig. 4d),  
413 which rapidly produce polyploids through cladogenesis events and thereby contribute  
414 to polyploids having the highest net accumulation rate (Fig. 4e). Rapid and recurrent  
415 neopolyploidy in *Athyrium* and *Diplazium* (Fig. S4) is distinct from *Asplenium*, which  
416 is characterized by a dominance of paleopolyploids (Schneider *et al.*, 2017). Taken  
417 together, these results imply that although neopolyploids in *Athyrium* and *Diplazium*  
418 tend to be short-lived, they play a key role in diversification dynamics (Vamosi *et al.*,  
419 2018).

420     Intraspecific variation in ploidy is common in plants, and many case studies have  
421 examined the origins of polyploidy at the population level, especially in genera of  
422 Asteraceae such as *Tragopogon* (Symonds *et al.*, 2010), *Artemisia* (Pellicer *et al.*,  
423 2010), *Helianthus* (Bock *et al.*, 2014), as well as in fern genera *Asplenium* (e.g. Dyer  
424 *et al.*, 2012) and *Dryopteris* (e.g. Ekrt & Koutecký, 2016), and *Pteris* (Chao *et al.*,  
425 2012). This study is the first to explicitly model how such polymorphic species may  
426 contribute to diversification dynamics at a macroevolutionary scale, and so it seems  
427 noteworthy to find that despite occurring at low frequency, their net diversification  
428 rates are in fact higher than pure diploids or polyploids. This is largely driven by  $\lambda_{113}$ ,  
429 the rate at which a polymorphic ancestor splits into polymorphic and polyploid

430 descendants (Fig 4a). Mechanistically, it seems reasonable to predict that this  
431 parameter reflects how newly formed polyploids in a population are likely to be  
432 reproductively isolated from their diploid progenitors, and thus form a new lineage.  
433 Intraspecific polyploidy can predispose species to be better adapted to harsher  
434 conditions in novel environments (Levin, 1983; Ramsey & Schemske, 2002; te Beest  
435 *et al.*, 2012). These results could be framed as a ‘ploidy-polymorphism compensation’  
436 hypothesis, wherein polymorphic species play a central role in the maintenance of  
437 neopolyploid diversity. The *Athyrium-Diplazium* clade is not likely to be unique in  
438 supporting this hypothesis; we predict that other lineages such as *Asplenium*  
439 (*Aspleniaceae*) and *Dryopteris* (*Dryopteridaceae*) and *Pteris* (*Pteridaceae*), in which  
440 autopolyploidy, hybridization and apomixis are prevalent (Chao *et al.*, 2012; H.M.  
441 Liu *et al.*, 2012), may have similar compensatory dynamics mitigating the high  
442 extinction risk of polyploids.

443 Why might polyploids have high speciation rates (Fig. 4a)? It is possible that some  
444 factors (a novel physical trait or a property of the environment) associated with  
445 polyploidization may play a role (Zhan *et al.*, 2016; Vamosi *et al.*, 2018). A few case  
446 studies have linked polyploidization to trait evolution and diversification (Schranz *et*  
447 *al.*, 2011; Tank *et al.*, 2015). In ferns, polyploids may facilitate long-distance  
448 dispersal via tolerance of inbreeding, i.e. gametophytic selfing, increasing the success  
449 rate of single-spore colonization (e.g. Tryon, 1985; Testo *et al.*, 2015; Sessa *et al.*,  
450 2016). This in turn might favor colonization of different ecological niches, and thus  
451 increase the probability for peripatric speciation. In *Deparia*, the species-rich genus in  
452 *Athyriaceae* that is sister to *Athyrium-Diplazium*, polyploid species are characterized  
453 by increased dispersal abilities and greater range expansion than sexual diploids (Kuo  
454 *et al.*, 2016). This seems to be true as well for *Athyrium* and *Diplazium*, in which  
455 polyploid species are often found more broadly distributed than their diploid relatives  
456 (Tryon & Tryon, 1982; Takamiya *et al.*, 1999, 2000; Takamiya & Ohta, 2001; Bir &  
457 Verma, 2010). It thus seems necessary for future studies to target other traits  
458 potentially linked polyploidy that could enhance dispersal ability.

459

#### 460 **Acknowledgements**

461 We thank Qin Li, Matthew Nelsen, Shrabya Timsina, and Charles Bell for helpful  
462 discussions and Jen-Pan Huang for technical assistance and advice about ClaSSE. We



463 thank Harald Schneider, Hong-Mei Liu, Yue-Hong Yan, Hui Shang, Atsushi Ebihara,  
464 Michael Kessler, Marcus Lehnert, Peter Hovenkamp, Ronald Viane, Sabine  
465 Hennequin and Claudine Mynssen for providing valuable materials. This study was  
466 supported by grants from the National Science Foundation of China Grant (No.  
467 31600175), the Beijing Natural Science Foundation Grant (No. 5162020) and the  
468 Visiting Scholar of Bureau of Personnel Chinese Academy of Sciences to the Field  
469 Museum awarded to R.W.

470

#### 471 **Author contributions**

472 X.-C.Z. and R.W. conceived the idea of this study; R.W. performed the experiments;  
473 M.A.S. provided important Neotropical materials; R.W. and R.H.R. analyzed data;  
474 and R.W., R.H.R., and M.A.S. wrote the paper, with significant contribution from X.-  
475 C.Z.

476

#### 477 **References**

- 478 Arakaki M, Christin PA, Nyffeler R, Lendel A, Eggli U, Ogburn RM, Spriggs E,  
479 Moore MJ, Edwards EJ. 2011. Contemporaneous and recent radiations of the  
480 world's major succulent plant lineages. *Proceedings of the National Academy of*  
481 *Sciences, USA* **108**: 8379–8384.
- 482 Arrigo N, Barker MS. 2012. Rarely successful polyploids and their legacy in plant  
483 genomes. *Current Opinion in Plant Biology* **16**: 140–146.
- 484 Bir SS, Verma SC. 2010. *Chromosome atlas of the Indian pteridophytes*. Dehra Dun,  
485 India: Gajendra Singh Gahlot.
- 486 Bock DG, Kane NC, Ebert DP, Rieseberg LH. 2014. Genome skimming reveals the  
487 origin of the Jerusalem Artichoke tuber crop species: neither from Jerusalem nor an  
488 artichoke. *New Phytologist* **201**: 1021–1030.
- 489 Ching R-C. 1964. On some confused genera of the family Athyriaceae. *Acta*  
490 *Phytotaxonomica Sinica* **9**: 41–84.
- 491 Chao Y-S, Liu H-Y, Chiang Y-C, Chiou W-L. 2012. Polyploidy and speciation in  
492 *Pteris* (Pteridaceae). *Journal of Botany* **2012**: 817920.
- 493 Collinson ME. 2001. Cainozoic ferns and their distribution. *Brittonia* **53**: 172–235.
- 494 Drummond AJ, Rambaut A. 2007. BEAST: Bayesian evolutionary analysis by  
495 sampling trees. *BMC Evolutionary Biology* **7**: 214.



- 496 Drummond CS, Eastwood RJ, Miotto STS, Hughes CE. 2012. Multiple continental  
497 radiations and correlates of diversification in *Lupinus* (Leguminosae): testing for  
498 key innovation with incomplete taxon sampling. *Systematic Biology* **61**: 443–460.
- 499 Dyer RJ, Savolainen V, Schneider H. 2012. Apomixis and reticulate evolution in the  
500 *Asplenium monanthes* fern complex. *Annals of Botany* **110**: 1515–1529.
- 501 Ekrt L, Koutecký P. 2016. Between sexual and apomictic: unexpectedly variable  
502 sporogenesis and production of viable polyhaploids in the pentaploid fern of the  
503 *Dryopteris affinis* agg. (Dryopteridaceae). *Annals of Botany* **117**: 97–106.
- 504 Fine PVA, Ree RH. 2006. Evidence for a time-integrated species-area effect on the  
505 latitudinal gradient in tree diversity. *The American Naturalist* **168**: 796–804.
- 506 FitzJohn RG. 2012. Diversitree: comparative phylogenetic analyses of diversification  
507 in R. *Methods in Ecology and Evolution* **3**: 1084–1092.
- 508 Glick L, Mayrose I. 2014. ChromEvol: assessing the pattern of chromosome number  
509 evolution and the inference of polyploidy along a phylogeny. *Molecular Biology  
510 and Evolution* **31**: 1914–1922.
- 511 Goldberg EE, Igić B. 2012. Tempo and mode in plant breeding system evolution.  
512 *Evolution* **66**: 3701–3709.
- 513 Harmon LJ, Weir JT, Brock CD, Glor RE, Challenger W. 2008. GEIGER:  
514 investigating evolutionary radiations. *Bioinformatics* **24**: 129–131.
- 515 Hsieh Y-T. 1986. The classification of *Athyrium* Roth. *Bulletin of Botanical Research*  
516 **6**, 129–135.
- 517 Hughes CE, Atchison GW. 2015. The ubiquity of alpine plant radiations: from the  
518 Andes to the Hengduan Mountains. *New Phytologist* **207**: 275–282.
- 519 Jablonski D, Roy K, Valentine JW. 2006. Out of the tropics: evolutionary dynamics  
520 of the latitudinal diversity gradient. *Science* **314**: 102–106.
- 521 Jetz W, Fine PVA. 2012. Global gradients in vertebrate diversity predicted by  
522 historical area-productivity dynamics and contemporary environment. *PLoS  
523 Biology* **10**: e1001292.
- 524 Karafit SJ, Rothwell GW, Stockey RA, Nishida H. 2006. Evidence for sympodial  
525 vascular architecture in a filicalean fern rhizome: *Dickwhitea allenbyensis* gen. et  
526 sp. nov. (Athyriaceae). *International Journal of Plant Sciences* **167**: 721–727.
- 527 Kato M. 1977. Classification of *Athyrium* and allied genera of Japan. *Botanical  
528 Magazine (Tokyo)* **90**: 23–40.

- 529 Kuo L-Y, Ebihara A, Shinohara W, Rouhan G, Wood KR, Wang C-N, Chiou W-L.  
530 2016. Historical biogeography of the fern genus *Deparia* (Athyriaceae) and its  
531 relation with polyploidy. *Molecular Phylogenetics and Evolution* **104**: 123–134.
- 532 Lagomarsino LP, Condamine FL, Antonelli A, Mulch A, Davis CC. 2016. The abiotic  
533 and biotic drivers of rapid diversification in Andean bellflowers (Campanulaceae).  
534 *New Phytologist* **210**: 1430–1442.
- 535 Lehtonen S, Silvestro D, Karger DN, Scotese C, Tuomisto H, Kessler M, Peña C,  
536 Wahlberg N, Antonelli A. 2017. Environmentally driven extinction and  
537 opportunistic origination explain fern diversification patterns. *Scientific Reports* **7**:  
538 4831.
- 539 Levin DA. 1983. Polyploidy and novelty in flowering plants. *The American*  
540 *Naturalist* **122**: 1–25.
- 541 Liu H-M, Dyer RJ, Guo Z-Y, Meng Z, Li J-H, Schneider H. 2012. The evolutionary  
542 dynamics of apomixis in ferns: a case study from polystichoid ferns. *Journal of*  
543 *Botany* **2012**: 510478.
- 544 Liu Y-C, Chiou W-L, Kato M. 2011. Molecular phylogeny and taxonomy of the fern  
545 genus *Anisocampium* (Athyriaceae). *Taxon* **60**: 824–830.
- 546 Mayrose I, Zhan S-H, Rothfels CJ, Magnuson-Ford KS, Barker MS, Rieseberg LH,  
547 Otto SP. 2011. Recently formed polyploid plants diversify at lower rates. *Science*  
548 **333**: 1257.
- 549 Mayrose I, Zhan S-H, Rothfels CJ, Arrigo N, Barker MS, Rieseberg LH, Otto SP.  
550 2015. Methods for studying polyploid diversification and the dead end hypothesis:  
551 a reply to Soltis *et al.* (2014). *New Phytologist* **206**: 27–35.
- 552 Mehra PN, Bir SS. 1960. Cytological observations on the Himalayan species of  
553 *Athyrium* and comments on the evolutionary status of the genus. *American Fern*  
554 *Journal* **50**: 276–295.
- 555 Mickel J, Smith AR. 2004. *Diplazium* Sw. In: Buck WR, ed. *Pteridophytes of Mexico*,  
556 *part 1*. New York, NY, USA: New York Botanical Garden Press, 251–268.
- 557 Miller MA, Pfeiffer W, Schwartz T. 2010. Creating the CIPRES Science Gateway for  
558 inference of large phylogenetic trees. In: *Proceedings of the Gateway Computing*  
559 *Environments Workshop (GCE), 14 November 2010*. New Orleans, LA, USA, 1–8.
- 560 Mittelbach GG, Schemske DW, Cornell HV, Allen AP, Brown JM, Bush MB,  
561 Harrison SP, Hurlbert AH, Knowlton N, Lessios HA *et al.* 2007. Evolution and the

- 562 latitudinal diversity gradient: speciation, extinction and biogeography. *Ecology*  
563 *Letters* **10**: 315–331.
- 564 Morley RJ. 2003. Interplate dispersal paths for megathermal angiosperms.  
565 *Perspectives in Plant Ecology, Evolution and Systematics* **6**: 5–20.
- 566 Orr HA. 1990. ‘Why polyploidy is rarer in animals than in plants’ revisited. *The*  
567 *American Naturalist* **6**: 759–770.
- 568 Pellicer J, Garcia S, Canela MA, Garnatje T, Korobkov AA, Twibell JD, Vallès J.  
569 2010. Genome size dynamics in *Artemisia* L. (Asteraceae): following the track of  
570 polyploidy. *Plant Biology* **12**: 820–830.
- 571 Perrie LR, Shepherd LD, De Lange PJ, Brownsey PJ. 2010. Parallel polyploid  
572 speciation: distinct sympatric gene-pools of recurrently derived allo-octoploid  
573 *Asplenium* ferns. *Molecular Ecology* **19**: 2916–2932.
- 574 PPG I. 2016. A community-derived classification for extant lycophytes and ferns.  
575 *Journal of Systematics and Evolution* **54**: 563–603.
- 576 Praptosuwiryo TN. 2008. *Biosystematic study of the fern genus Diplazium in west*  
577 *Malesia*. PhD thesis, Bogor Agricultural University, Bogor, Indonesia.
- 578 Rabosky DL, Adams DC. 2012. Rates of morphological evolution are correlated with  
579 species richness in salamanders. *Evolution* **66**: 1807–1818.
- 580 Rabosky DL. 2014. Automatic detection of key innovations, rate shifts, and diversity-  
581 dependence on phylogenetic trees. *PLoS ONE* **9**: e89543.
- 582 Rabosky DL, Goldberg EE. 2015. Model inadequacy and mistaken inferences of trait-  
583 dependent speciation. *Systematic Biology* **64**: 340–355.
- 584 Rabosky DL, Title PO, Huang H. 2015. Minimal effects of latitude on present-day  
585 speciation rates in New World birds. *Proceedings of the Royal Society B:*  
586 *Biological Sciences* **282**: 20142889.
- 587 Ramsey J, Schemske WD. 2002. Neopolyploidy in flowering plants. *Annual Review*  
588 *of Ecology and Systematics* **33**: 589–639.
- 589 Ramírez-Barahona S, Barrera-Redondo J, Eguiarte LE. 2016. Rates of ecological  
590 divergence and body size evolution are correlated with species diversification in  
591 scaly tree ferns. *Proceedings of the Royal Society B: Biological Sciences* **283**:  
592 20161098.
- 593 Roquet C, Boucher FC, Thuiller W, Lavergne S. 2013. Replicated radiations of the  
594 alpine genus *Androsace* (Primulaceae) driven by range expansion and convergent

- 595 key innovations. *Journal of Biogeography* **40**: 1874–1886.
- 596 Rothfels CJ, Li F-W, Sigel EM, Huiet L, Larsson A, Burge DO, Ruhsam M, Deyholos  
597 M, Soltis DE, Stewart CN *et al.* 2015. The evolutionary history of ferns inferred  
598 from 25 low-copy nuclear genes. *American Journal of Botany* **102**: 1–19.
- 599 Rothwell GW, Stockey RA. 1991. *Onoclea sensibilis* in the Paleocene of North  
600 America, a dramatic example of structural and ecological stasis. *Review of*  
601 *Palaeobotany and Palynology* **70**: 113–124.
- 602 Schluter D. 2015. Speciation, ecological opportunity, and latitude. *The American*  
603 *Naturalist* **187**: 1–18.
- 604 Schneider H, Schuettpelez E, Pryer KM, Cranfill R, Magallón S, Lupia R. 2004. Ferns  
605 diversified in the shadow of angiosperms. *Nature* **428**: 553–557.
- 606 Schneider H, Liu H-M, Chang Y-F, Ohlsen D, Perrie LR, Shepherd L, Kessler M,  
607 Karger DN, Hennequin S, Marquardt J *et al.* 2017. Neo- and Paleopolyploidy  
608 contribute to the species diversity of *Asplenium* – the most species-rich genus of  
609 ferns. *Journal of Systematics and Evolution* **55**: 353–364.
- 610 Schranz ME, Mohammadin S, Edger PP. 2012. Ancient whole genome duplications,  
611 novelty and diversification: the WGD Radiation Lag-Time Model. *Current Opinion*  
612 *in Plant Biology* **15**: 147–153.
- 613 Schuettpelez E, Pryer KM. 2009. Evidence for a Cenozoic radiation of ferns in an  
614 angiosperm-dominated canopy. *Proceedings of the National Academy of Sciences,*  
615 *USA* **106**: 11200–11205.
- 616 Schwery O, Onstein RE, Bouchenak-Khelladi Y, Xing Y-W, Carter RJ, Linder HP.  
617 2015. As old as the mountains: the radiations of the Ericaceae. *New Phytologist* **207**:  
618 355–367.
- 619 Sessa EB, Testo WL, Watkins JE Jr. 2016. On the widespread capacity for, and  
620 functional significance of, extreme inbreeding in ferns. *New Phytologist* **211**: 1108–  
621 1119.
- 622 Soltis DE, Segovia-Salcedo MC, Jordon-Thaden I, Majure L, Miles NM, Mavrodiev  
623 EV, Mei W-B, Cortez MB, Soltis PS, *et al.* 2014. Are polyploids really  
624 evolutionary dead-ends (again)? A critical reappraisal of Mayrose *et al.* (2011).  
625 *New Phytologist* **202**: 1105–1117.
- 626 Soltis DE, Visger CJ, Marchant DB, Soltis PS. 2016. Polyploidy: pitfalls and paths to  
627 a paradigm. *American Journal of Botany* **103**: 1223–1235.

- 628 Spriggs EL, Clement WL, Sweeney PW, Madriñán S, Edwards EJ, Donoghue MJ.  
629 2015. Temperate radiations and dying embers of a tropical past: the diversification  
630 of *Viburnum*. *New Phytologist* **207**: 340–354.
- 631 Stockey RA, Nishida H, Rothwell GW. 1999. Permineralized ferns from the Middle  
632 Eocene Princeton chert. I. *Makopteris princetonensis* gen. et sp. nov.  
633 (Athyriaceae). *International Journal of Plant Sciences* **160**: 1047–1055.
- 634 Stolze RG, Pacheco L, Øllgaard B. 1994. Physematieae. In: Harling G, Andersson L,  
635 eds, *Flora of Ecuador, vol. 49*. Gothenburg, Sweden: University of Gothenburg, 1–  
636 108.
- 637 Sundue MA, Testo W, Ranker TA. 2015. Morphological innovation, ecological  
638 opportunity, and the radiation of a major vascular epiphyte lineage. *Evolution* **69**:  
639 2482–2495.
- 640 Symonds VV, Soltis PS, Soltis DE. 2010. Dynamics of polyploid formation in  
641 *Tragopogon* (Asteraceae): recurrent formation, gene flow, and population structure.  
642 *Evolution* **64**: 1984–2003.
- 643 Takamiya M, Takaoka C, Ohta N. 1999. Cytological and reproductive studies on  
644 Japanese *Diplazium* (Woodsiaceae; Pteridophyta): apomictic reproduction in  
645 *Diplazium* with evergreen bi- to tripinnate leaves. *Journal of Plant Research* **112**:  
646 419–436.
- 647 Takamiya M, Ohta N, Fujimaru-Takaoka C, Uki K. 2000. Cytological and  
648 reproductive studies of Japanese *Diplazium* (Woodsiaceae; Pteridophyta). II.  
649 Polyploidy and hybridity in the species group with summer-green bi- to tripinnate  
650 leaves. *Journal of Plant Research* **113**: 203–215.
- 651 Takamiya M, Ohta N. 2001. Cytological and reproductive studies of Japanese  
652 *Diplazium* (Woodsiaceae; Pteridophyta). III. The cytological complexity of species  
653 groups with simply pinnate to bipinnatifid leaves. *Journal of Plant Research* **114**:  
654 443–457.
- 655 Tank DC, Eastman JM, Pennell MW, Soltis PS, Soltis DE, Hinchliff CE, Brown JW,  
656 Sessa EB, Harmon LJ. 2015. Nested radiations and the pulse of angiosperm  
657 diversification: increased diversification rates often follow whole genome  
658 duplications. *New Phytologist* **207**: 454–467.
- 659 te Beest M, Roux JJJ, Richardso DM, Brysting AK, Suda J, Kubešová M, Pyšek P.  
660 2012. The more the better? The role of polyploidy in facilitating plant invasions.

- 661 *Annals of Botany* **109**: 19–45.
- 662 Testo WL, Watkins JE Jr, Barrington DS. 2015. Dynamics of asymmetrical  
663 hybridization in North American wood ferns: reconciling patterns of inheritance  
664 with gametophyte reproductive biology. *New Phytologist* **206**: 785–795.
- 665 Testo W, Sundue MA. 2016. A 4000-species dataset provides new insight into the  
666 evolution of ferns. *Molecular Phylogenetics and Evolution* **105**: 200–211.
- 667 Testo W, Sundue MA. 2018. Are rates of species diversification and body size  
668 evolution coupled in the ferns? *American Journal of Botany* **105**: 1–11.
- 669 Tiffney BH, Manchester SR. 2001. The use of geological and paleontological  
670 evidence in evaluating plant phylogeographic hypotheses in the northern  
671 hemisphere tertiary. *International Journal of Plant Sciences* **162**: S3–S17.
- 672 Tryon RM. 1985. Fern speciation and biogeography. *Proceedings of the Royal Society*  
673 *of Edinburgh. Section B. Biological Sciences* **86**: 353–360.
- 674 Tryon RM, Stolze RG. 1991. *Pteridophytes of Peru, part 4*. Chicago, IL, USA: Field  
675 Museum of Natural History.
- 676 Tryon RM, Tryon AF. 1982. *Ferns and allied plants with special reference to the*  
677 *tropical America*. New York, NY, USA: Springer-Verlag.
- 678 Tryon RM. 1985. Fern speciation and biogeography. *Proceedings of the Royal Society*  
679 *of Edinburgh. Section B. Biological Sciences* **86**: 353–360.
- 680 Vamosi JC, Magallón S, Mayrose I, Otto SP, Sauquet H. 2018. Macroevolutionary  
681 patterns of flowering plant speciation and extinction. *Annual Review of Plant*  
682 *Biology* **69**: 685–706.
- 683 Walker TG. 1966. A cytotaxonomic survey of the pteridophytes of Jamaica.  
684 *Transactions of the Royal Society of Edinburgh* **66**: 169–237.
- 685 Walker TG. 1973. Additional cytotaxonomic notes on the pteridophytes of Jamaica.  
686 *Transactions of the Royal Society of Edinburgh* **69**: 109–135.
- 687 Wang Z-R. 1997. A revision of the Chinese *Athyrium* Roth (I) – subgeneric  
688 classification of the genus. *Bulletin of Botanical Research* **17**: 274–300.
- 689 Wang Z-R, He Z-R, Kato M. 2013. Athyriaceae. In: Wu Z, Raven PH, Hong D, eds.  
690 *Flora of China, vol. 2–3*. Beijing: Science Press; St. Louis: Missouri Botanical  
691 Garden Press, 418–534.
- 692 Wei R, Schneider H, Zhang X-C. 2013. Toward a new circumscription of the  
693 twinsorus-fern genus *Diplazium* (Athyriaceae): a molecular phylogeny with



- 694 morphological implications and infrageneric taxonomy. *Taxon* **62**: 441–457.
- 695 Wei R, Xiang Q-P, Schneider H, Sundue MA, Kessler M, Kamau PW, Hidayat A,  
696 Zhang X-C. 2015. Eurasian origin, boreotropical migration and transoceanic  
697 dispersal in the pantropical fern genus *Diplazium* (Athyriaceae). *Journal of*  
698 *Biogeography* **42**: 1809–1819.
- 699 Wei R, Ebihara A, Zhu Y-M, Zhao C-F, Hennequin S, Zhang X-C. 2018. A total-  
700 evidence phylogeny of the lady fern genus *Athyrium* Roth (Athyriaceae) with a new  
701 infrageneric classification. *Molecular Phylogenetics and Evolution* **119**: 25–36.
- 702 Weir JT, Schluter D. 2007. The latitudinal gradient in recent speciation and extinction  
703 rates of birds and mammals. *Science* **135**: 1574–1576.
- 704 Wiens JJ, Donoghue MJ. 2004. Historical biogeography, ecology and species richness.  
705 *Trends in Ecology and Evolution* **19**: 639–644.
- 706 Wood TE, Takebayashi N, Barker MS, Mayrose I, Greenspoon PB, Rieseberg LH.  
707 2009. The frequency of polyploid speciation in vascular plants. *Proceedings of the*  
708 *National Academy of Sciences, USA* **106**: 13875–13879.
- 709 Wright S. 1969. *Evolution and Genetics of Populations. II. The Theory of Gene*  
710 *Frequencies*. Chicago: University of Chicago Press.
- 711 Xing Y-W, Ree RH. 2017. Uplift-driven diversification in the Hengduan Mountains, a  
712 temperate biodiversity hotspot. *Proceedings of the National Academy of Sciences,*  
713 *USA* **114**: 3444–3451.
- 714 Yu Y, Harris AJ, Blair C, He X-J. 2015. RASP (Reconstruct Ancestral State in  
715 Phylogenies): A tool for historical biogeography. *Molecular Phylogenetics and*  
716 *Evolution* **87**: 46–49.
- 717 Zachos J, Pagani M, Sloan L, Thomas E, Billups, K. 2001. Trends, rhythms, and  
718 aberrations in global climate 65 Ma to present. *Science* **292**: 686–693.
- 719 Zhan S-H, Glick L, Tsigenopoulos CS, Otto SP, Mayrose I. 2014. Comparative  
720 analysis reveals that polyploidy does not decelerate diversification in fish. *Journal*  
721 *of Evolutionary Biology* **27**: 391–403.
- 722 Zhan S-H, Drori M, Goldberg EE, Otto SP, Mayrose I. 2016. Phylogenetic evidence  
723 for cladogenetic polyploidization in land plants. *American Journal of Botany* **103**:  
724 1252–1258.
- 725 Zhang X-C. 1992. Taxonomy of *Athyrium* Roth subgen. *Athyrium* in Yunnan. *Acta*  
726 *Phytotaxonomica Sinica* **30**: 245–255.



727

728 **Supporting Information**

729 Additional Supporting Information may be found online in the Supporting  
730 Information tab for this article:

731

732 **Fig. S1** Chronogram of the *Athyrium-Diplazium* clade with four calibration points.

733 **Fig. S2** Positions of regime shifts in the maximum a posteriori configuration inferred  
734 from the Bayesian analysis of macro-evolutionary mixtures (BAMM).

735 **Fig. S3** Rate simulations and their estimates of confidence intervals for each of the  
736 states under 100 replicates of simulated trees and random assignment of 'NA' to tip  
737 states in ClaSSE.

738 **Fig. S4** CHROMEVOL inferences for the *Athyrium-Diplazium* clade.

739 **Fig. S5** Rate-through-time plot of rates of speciation, extinction and species turnover  
740 (termed ' $\mu/\lambda$ ') obtained from BAMM.

741 **Table S1** Species sampling fraction used in macroevolution analyses.

742 **Table S2** Taxa, voucher information and GenBank accession numbers of specimens  
743 used in this study.

744 **Table S3** Traits information and coding in QuaSSE, CHROMEVOL and ClaSSE.

745 **Table S4** Model selection and results of QuaSSE on the entire ingroup clade as well  
746 as separately on *Athyrium* and *Diplazium*.

747 **Table S5** Model selection and results of ClaSSE based on the entire ingroup clade as  
748 well as separately on *Athyrium* and *Diplazium*.

749 **Table S6** Bayes factor of different diversification rate models fitted on the *Athyrium-*  
750 *Diplazium* dataset.

751 **Table S7** ClaSSE model simulation based on 100 simulated trees with random  
752 assignment of missing information to tips.

753

754

755

756

757

758

759

760

761

762

763

764

765

766

767

768

769

770

771

772

773 **Table 1** Parameter comparison of the best-fit model of quantitative state speciation and extinction (QuaSSE) analysis based on the entire ingroup  
 774 clade as well as separately on *Athyrium* and *Diplazium*.  $\lambda_0$ , rate at lowest values of the log elevation for sigmoid and unimodal models;  $\lambda_1$ ,  
 775 maximum speciation rate for the unimodal models;  $x_{\text{mid}}$ , inflection point of the sigmoid or the place of the maximum for modal models;  $s^2$ , width  
 776 (variance) of the Gaussian function;  $\mu$ , rate of extinction;  $\sigma^2$ , Brownian diffusion rate of trait evolution.

| Rates and Parameters | <i>Athyrium</i> clade                     | <i>Diplazium</i> clade           | The entire ingroup clade                  |
|----------------------|-------------------------------------------|----------------------------------|-------------------------------------------|
|                      | <b>Unimodal with directional tendency</b> | <b>Unimodal with no tendency</b> | <b>Unimodal with directional tendency</b> |
| $\lambda_0$          | 1.00e-04                                  | 0.0322                           | 0.0303                                    |
| $\lambda_1$          | 0.8484                                    | 0.4197                           | 0.5643                                    |
| $\mu$                | 0.5375                                    | 0.1617                           | 0.3315                                    |
| $x_{\text{mid}}$     | 7.83                                      | 6.965                            | 7.712                                     |
| $s^2$                | 0.1954                                    | 0.1066                           | 0.4128                                    |
| $\sigma^2$           | 0.0482                                    | 0.0524                           | 0.0481                                    |
| Directional          | -0.091                                    | -0.0013                          | -0.086                                    |

777

778

779

780

781

782

783

784

785

786 **Table 2** Parameter comparisons of the best-fit model in cladogenetic state change speciation and extinction (ClaSSE) analysis based on the  
 787 entire ingroup clade as well as separately on *Athyrium* and *Diplazium*. Both containing diploidy and polyploidy is coded as 1; diploidy is coded  
 788 as 2; polyploidy is coded as 3.  $\lambda$ , speciation rate;  $\mu$ , rate of extinction;  $q$ , transition rate between two states. All rates are presented with median  
 789 values and 95% highest posterior density (HPD) intervals in brackets based on 100 000 MCMC optimization.

|                 | <i>Athyrium</i> clade                                                                                                                                                                                                                                                                                  | <i>Diplazium</i> clade | The entire ingroup clade |
|-----------------|--------------------------------------------------------------------------------------------------------------------------------------------------------------------------------------------------------------------------------------------------------------------------------------------------------|------------------------|--------------------------|
| Rates           | <b>Best-fit model: Cladogenetic speciation and extinction (<math>\lambda_{111} \neq \lambda_{222} \neq \lambda_{333} \neq \lambda_{112} \neq \lambda_{113} \neq \lambda_{123} \neq \lambda_{223}</math>, <math>\mu_1 \neq \mu_2 \neq \mu_3</math>, <math>q_{12} = q_{21} = q_{13} = q_{23}</math>)</b> |                        |                          |
| $\lambda_{111}$ | 0.5221 [0.2089–1.3218]                                                                                                                                                                                                                                                                                 | 0.2128 [0.0951–0.4404] | 0.334 [0.1902–0.6158]    |
| $\lambda_{222}$ | 0.1758 [0.0822–0.3604]                                                                                                                                                                                                                                                                                 | 0.0898 [0.0467–0.1573] | 0.1326 [0.0741–0.2332]   |
| $\lambda_{333}$ | 0.9462 [0.1513–2.727]                                                                                                                                                                                                                                                                                  | 0.7056 [0.2735–1.279]  | 0.7054 [0.2575–1.299]    |
| $\lambda_{112}$ | 0.1758 [0.01–0.6164]                                                                                                                                                                                                                                                                                   | 0.0864 [0.0045–0.3042] | 0.0836 [0.0061–0.229]    |
| $\lambda_{113}$ | 1.6779 [0.261–4.305]                                                                                                                                                                                                                                                                                   | 0.9392 [0.3241–2.023]  | 0.8974 [0.4328–1.7195]   |
| $\lambda_{123}$ | 0.173 [0.008–0.6014]                                                                                                                                                                                                                                                                                   | 0.063 [0.0032–0.2097]  | 0.073 [0.0038–0.2145]    |
| $\lambda_{223}$ | 0.3929 [0.032–1.485]                                                                                                                                                                                                                                                                                   | 0.0707 [0.0028–0.4607] | 0.0667 [0.0029–0.3541]   |
| $\mu_1$         | 0.3658 [0.023–1.263]                                                                                                                                                                                                                                                                                   | 0.0672 [0.0027–0.3211] | 0.1658 [0.0107–0.49]     |
| $\mu_2$         | 0.2075 [0.022–0.4686]                                                                                                                                                                                                                                                                                  | 0.0258 [0.001–0.1228]  | 0.0809 [0.0054–0.2366]   |
| $\mu_3$         | 1.427 [0.5903–3.247]                                                                                                                                                                                                                                                                                   | 0.7513 [0.3637–1.336]  | 0.829 [0.4372–1.432]     |
| $q$             | 0.0421 [0.004–0.1926]                                                                                                                                                                                                                                                                                  | 0.0276 [0.0076–0.0704] | 0.0255 [0.0081–0.0614]   |

790

791

792

793

794

795

796 **Figure Legends:**

797 **Fig. 1** The cladogenetic-state change speciation and extinction (ClaSSE) models with  
798 cladogenetic and anagenetic changes. (a) The full model including cladogenetic  
799 diversification and anagenetic state change is depicted. In the diagram, lineages  
800 presented by both diploid and polyploid populations have state 1, and those with only  
801 diploids have state 2, and those with only polyploids have state 3. Each speciation  
802 event gives rise to two daughters (as shown by arrows), either in the same state (at  
803 rates  $\lambda_{111}$ ,  $\lambda_{222}$ , and  $\lambda_{333}$ ) or in different states ( $\lambda_{112}$ ,  $\lambda_{113}$ ,  $\lambda_{123}$ , and  $\lambda_{223}$ ). Thus, changes  
804 in ploidy can occur through the anagenetic ( $q_{12}$ ,  $q_{13}$ ,  $q_{21}$ , and  $q_{23}$ ) or cladogenetic  
805 pathway ( $\lambda_{112}$ ,  $\lambda_{113}$ ,  $\lambda_{123}$ , and  $\lambda_{223}$ ). Extinction rates in each state are represented by  $\mu_1$ ,  
806  $\mu_2$  and  $\mu_3$ . The rates in gray indicate equal rates, respectively. (b) The null model with  
807 equal speciation, extinction and transition rates, respectively. (c) The ‘cladogenetic’  
808 model. (d) The ‘anagenetic’ model. (e) The ‘Extinction’ model. (f) The ‘cladogenetic-  
809 anagenetic’ model.

810

811 **Fig. 2** Results of the Bayesian analysis of macro-evolutionary mixtures (BAMM) and  
812 quantitative-state speciation and extinction (QuaSSE) analyses. (a) Chronorate plot  
813 with branches colored by speciation rate (events  $\text{Myr}^{-1}$  per lineage) as indicated by  
814 the scale bar, representing a summary of the full post-burn-in Markov chain Monte  
815 Carlo (MCMC) sample of the BAMM analysis. Red circles indicate the positions of  
816 regime shifts in the maximum *a posteriori* (MAP) configuration. Numbers beneath  
817 the shifts indicate the marginal probability of a shift occurring along that branch. Log  
818 elevation is shown by the horizontal bar for each species. The vertical dashed lines  
819 indicate the approximate ranges of altitudes in which elevated speciation rates were  
820 inferred by QuaSSE analysis, and extant species whose elevation falls in this range  
821 have their data colored red. (b) Rate-through-time plots for speciation rate (events  
822  $\text{Myr}^{-1}$  per lineage) with 95% confidence interval indicated by yellow shaded areas.  
823 Red, the rate across the phylogeny (‘background rate’); blue, the rate of *Athyrium*  
824 clade; green, the rate of *Diplazium* clade.

825

826 **Fig. 3** Relationship between the elevation and speciation rates as inferred from  
827 QuaSSE analysis, with comparison to the elevational species richness histograms of  
828 the *Athyrium* clade, the *Diplazium* clade and the whole phylogeny, respectively. Red,

829 the rate across the phylogeny; blue, the rate of *Athyrium* clade; green, the rate of  
830 *Diplazium* clade.

831

832 **Fig. 4** Posterior distributions of macroevolutionary rates under the best-fitting model  
833 of the ClaSSE analysis based on the MCC tree, allowing cladogenetic speciation and  
834 extinction of diploids and polyploids. (a) The cladogenetic speciation rates of diploid-  
835 polyploid mediated speciation events. (b) The extinction rates of three ploidy states. (c)  
836 The transition rate of all anagenetic change (equal). (d) Summary of speciation rates  
837 of each state. (e) The net diversification rates of ploidy in cladogenetic speciation. (f)  
838 The net accumulation rates of ploidy in cladogenetic speciation.

839



**(a)**

Full model

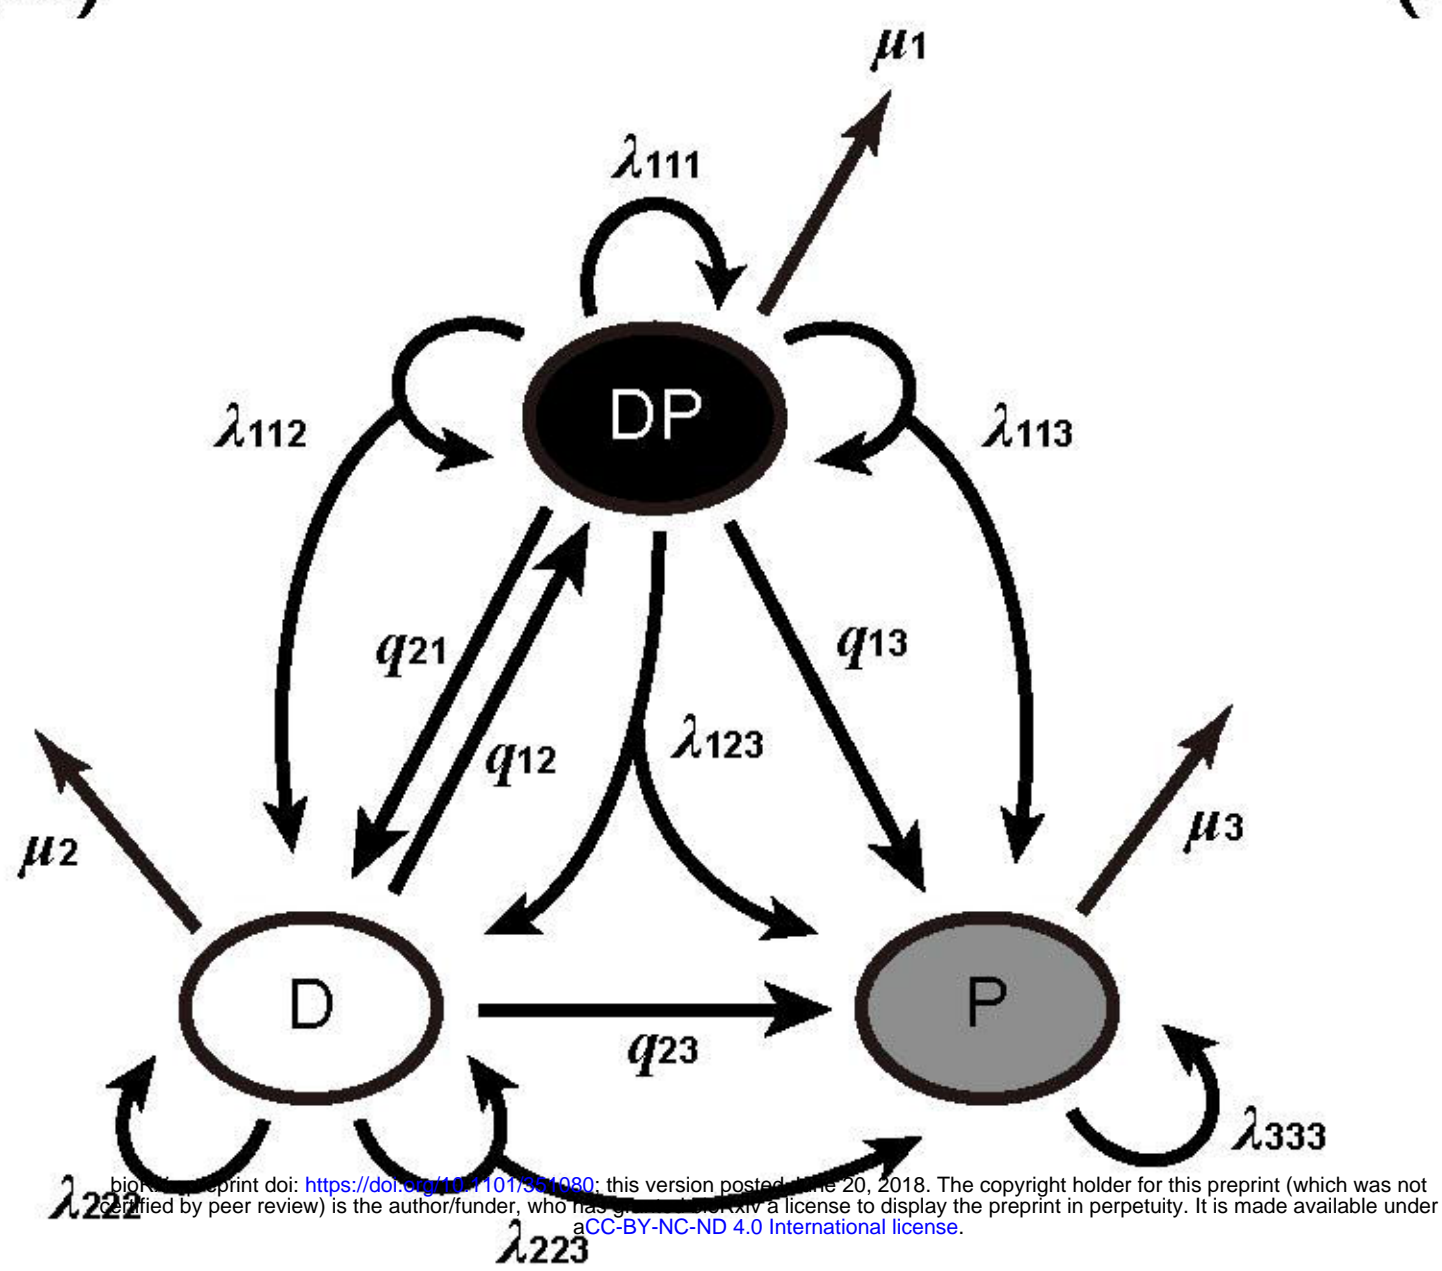

No. of parameters: 14

**(b)**

Null model

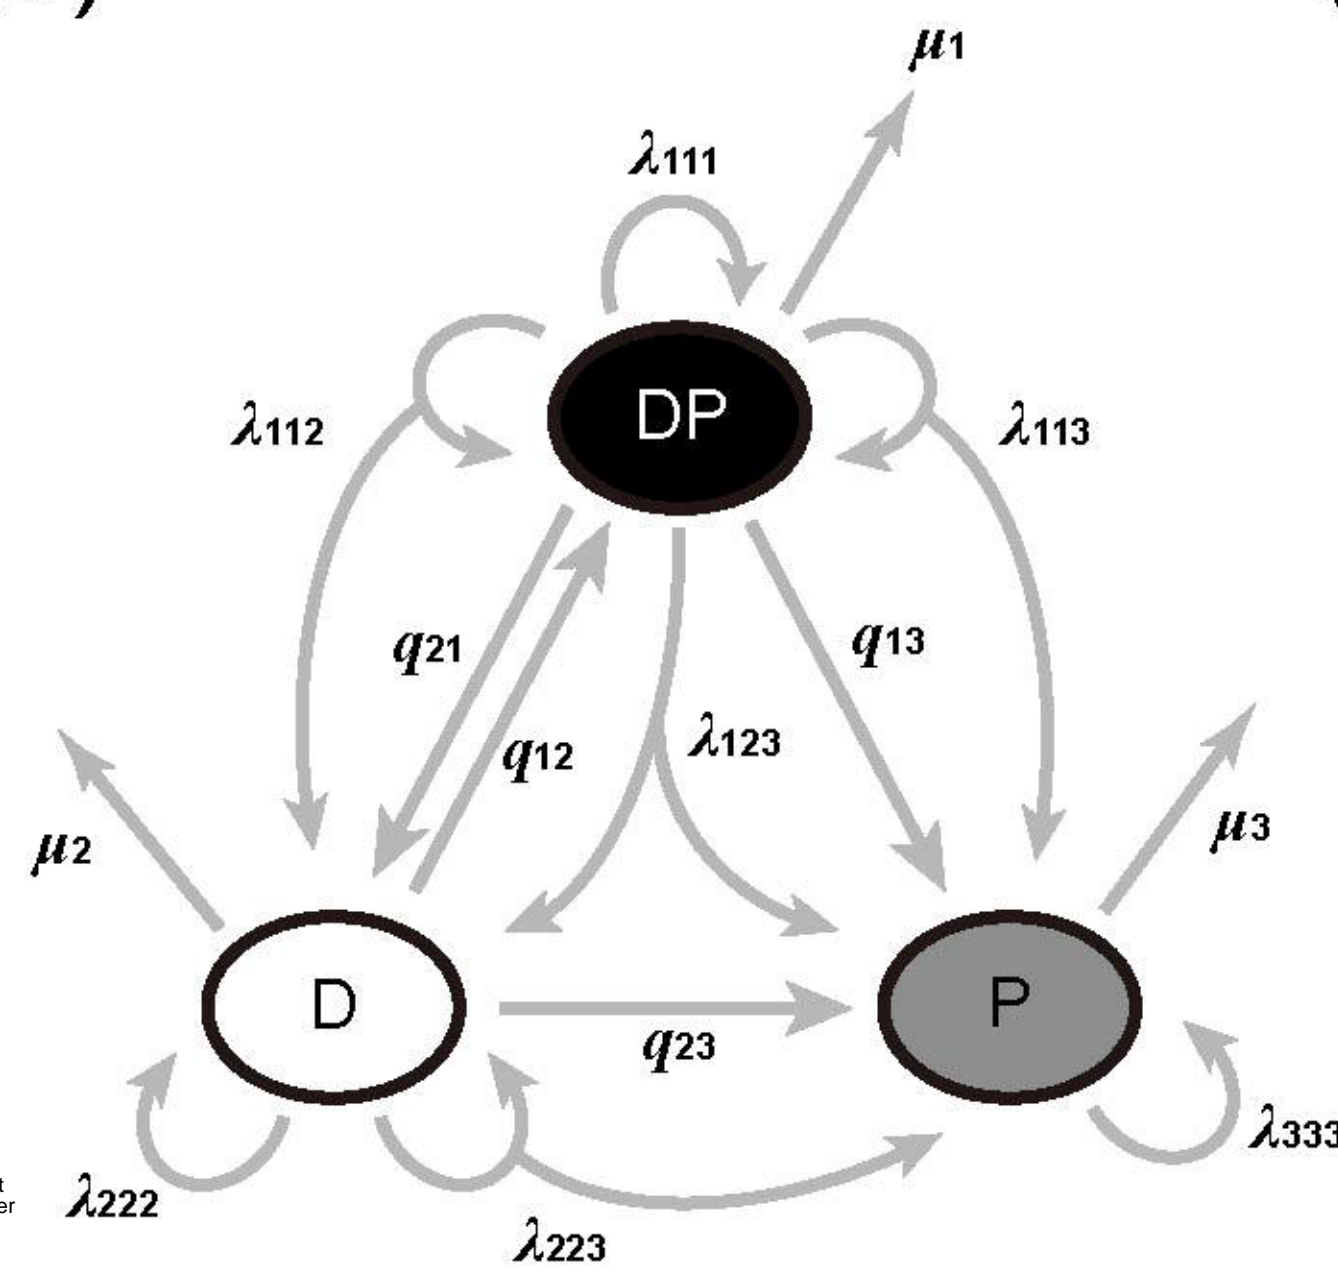

No. of parameters: 3

**(c)**

'Cladogenetic' model

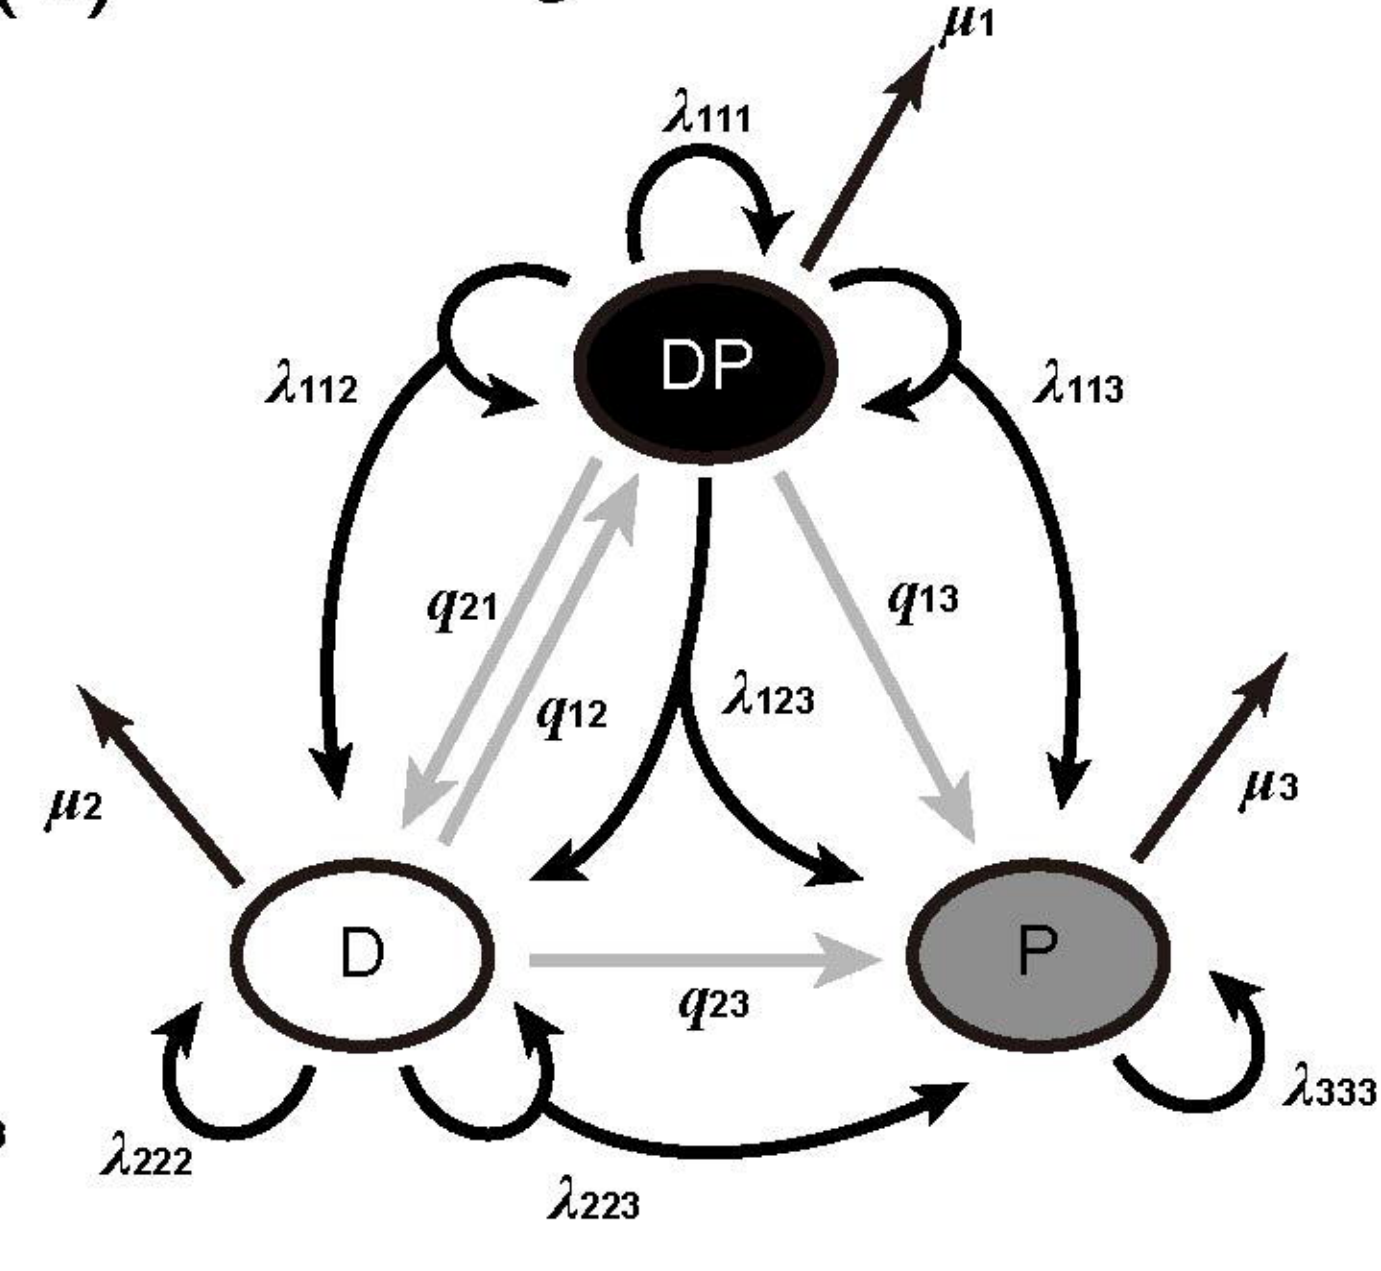

No. of parameters: 11

**(d)**

'Anagenetic' model

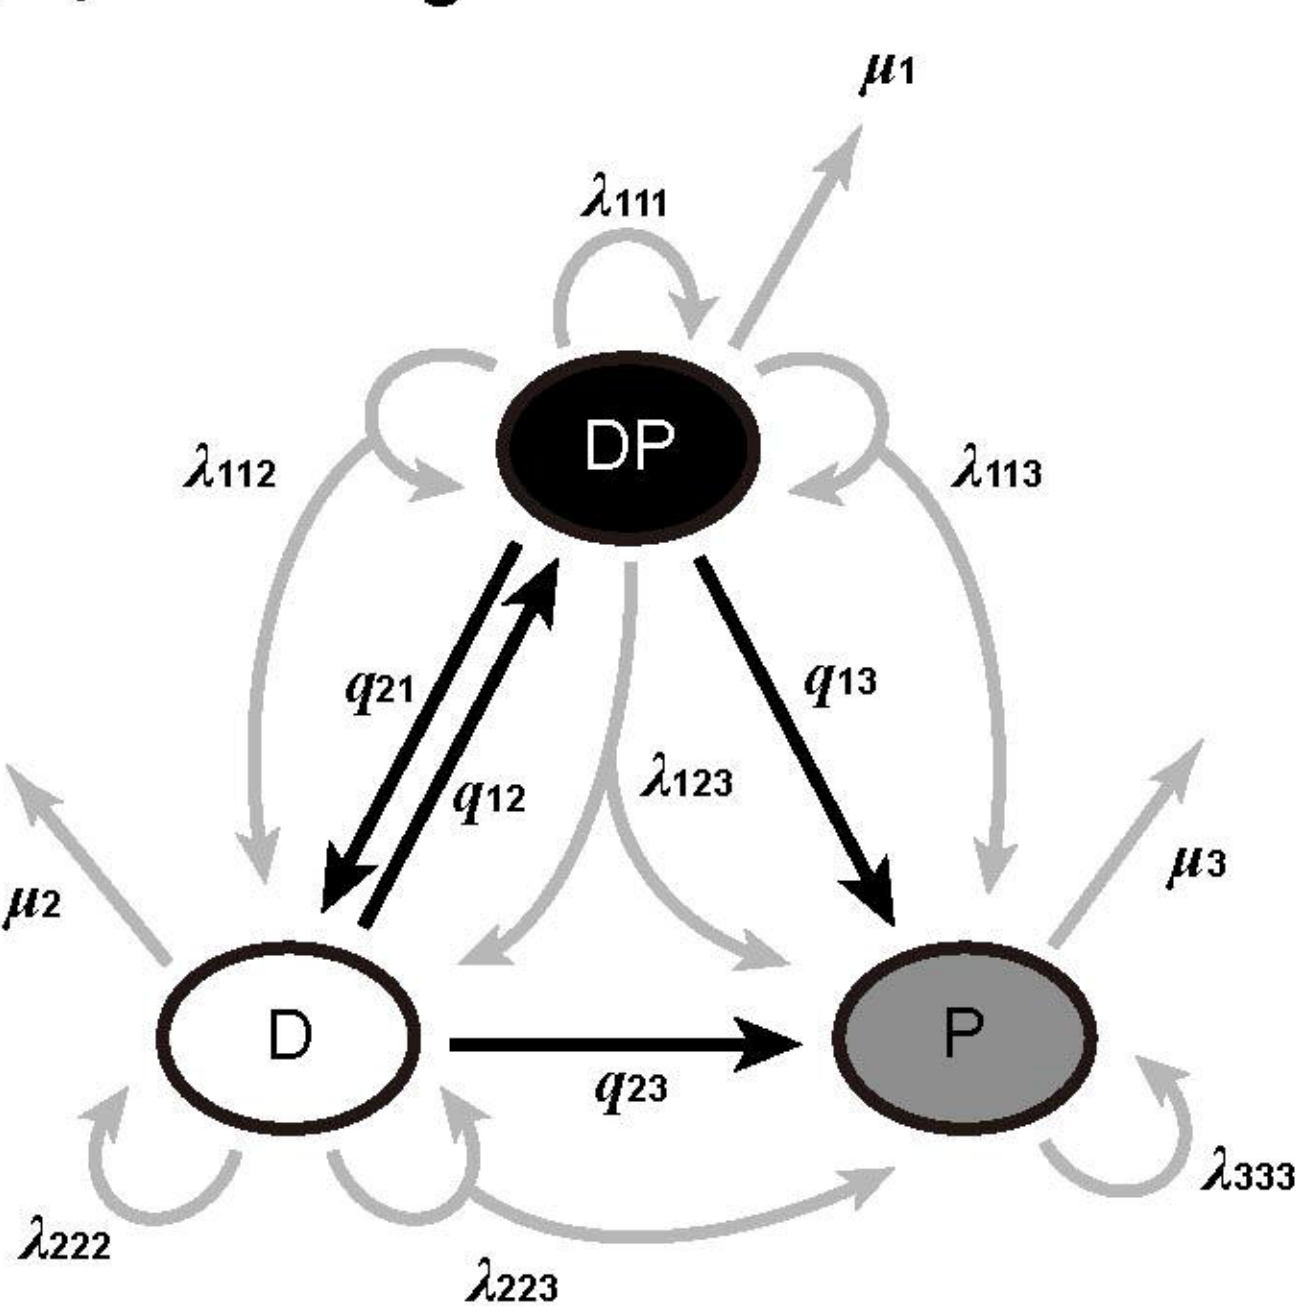

No. of parameters: 6

**(e)**

'Extinction' model

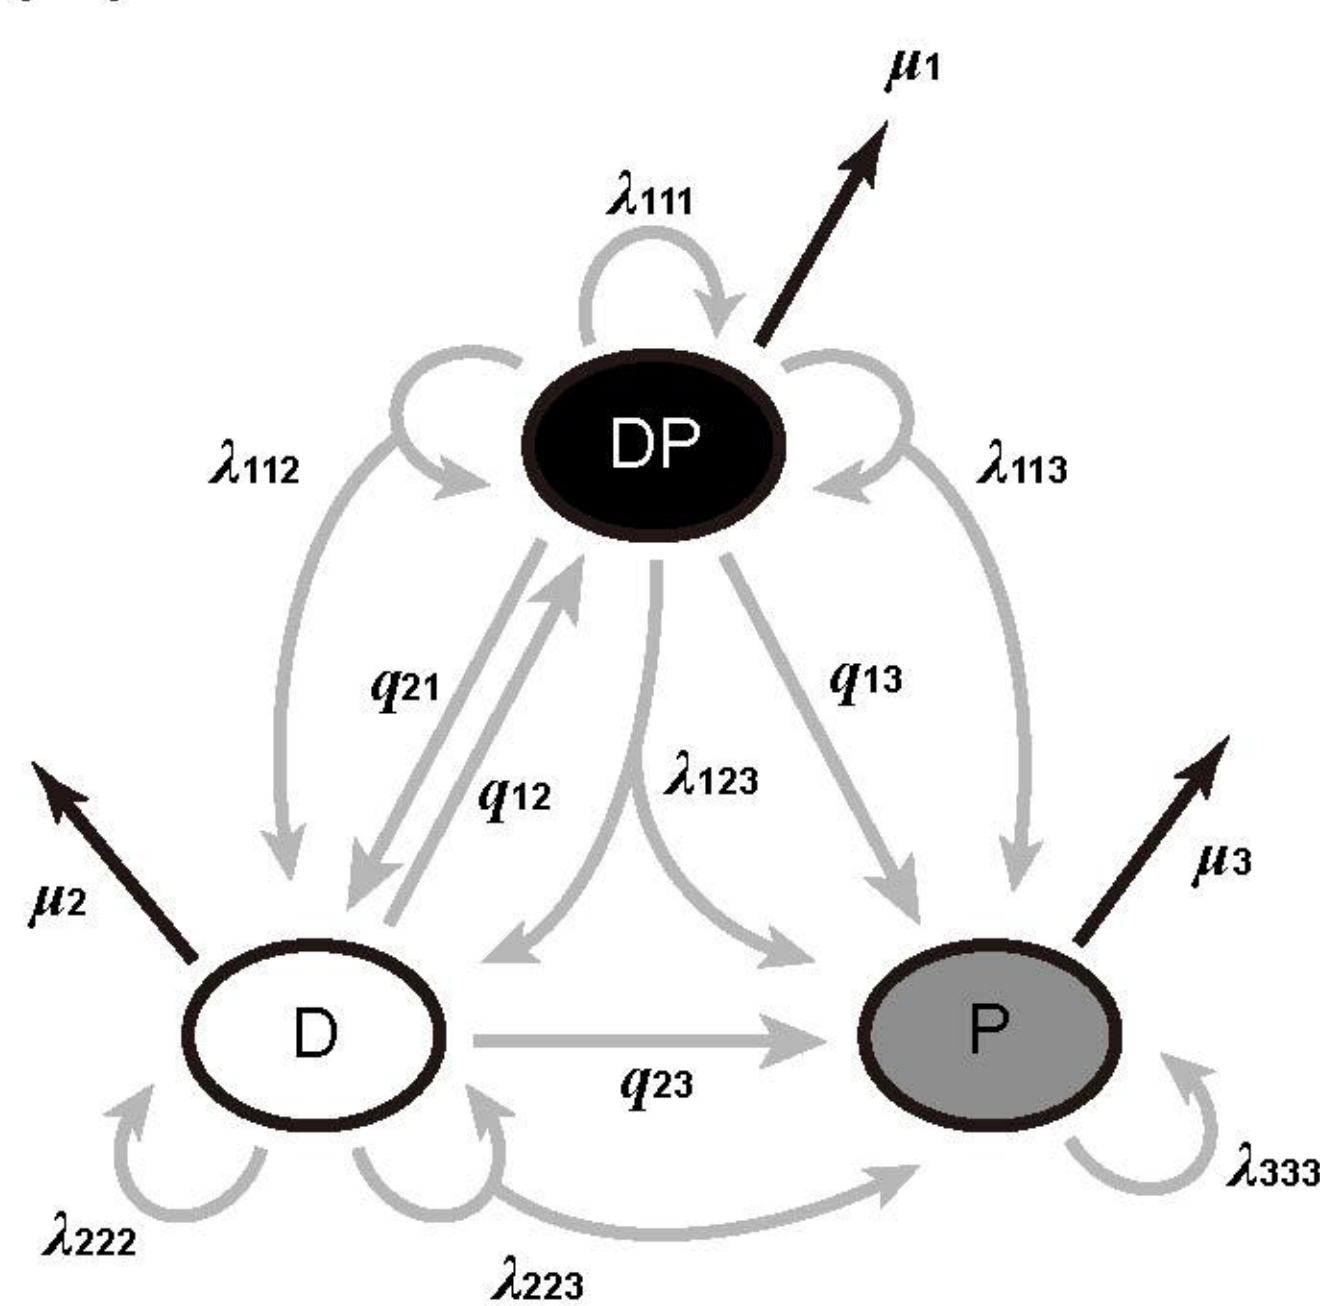

No. of parameters: 5

**(f)**

'Cladogenetic-anagenetic' model

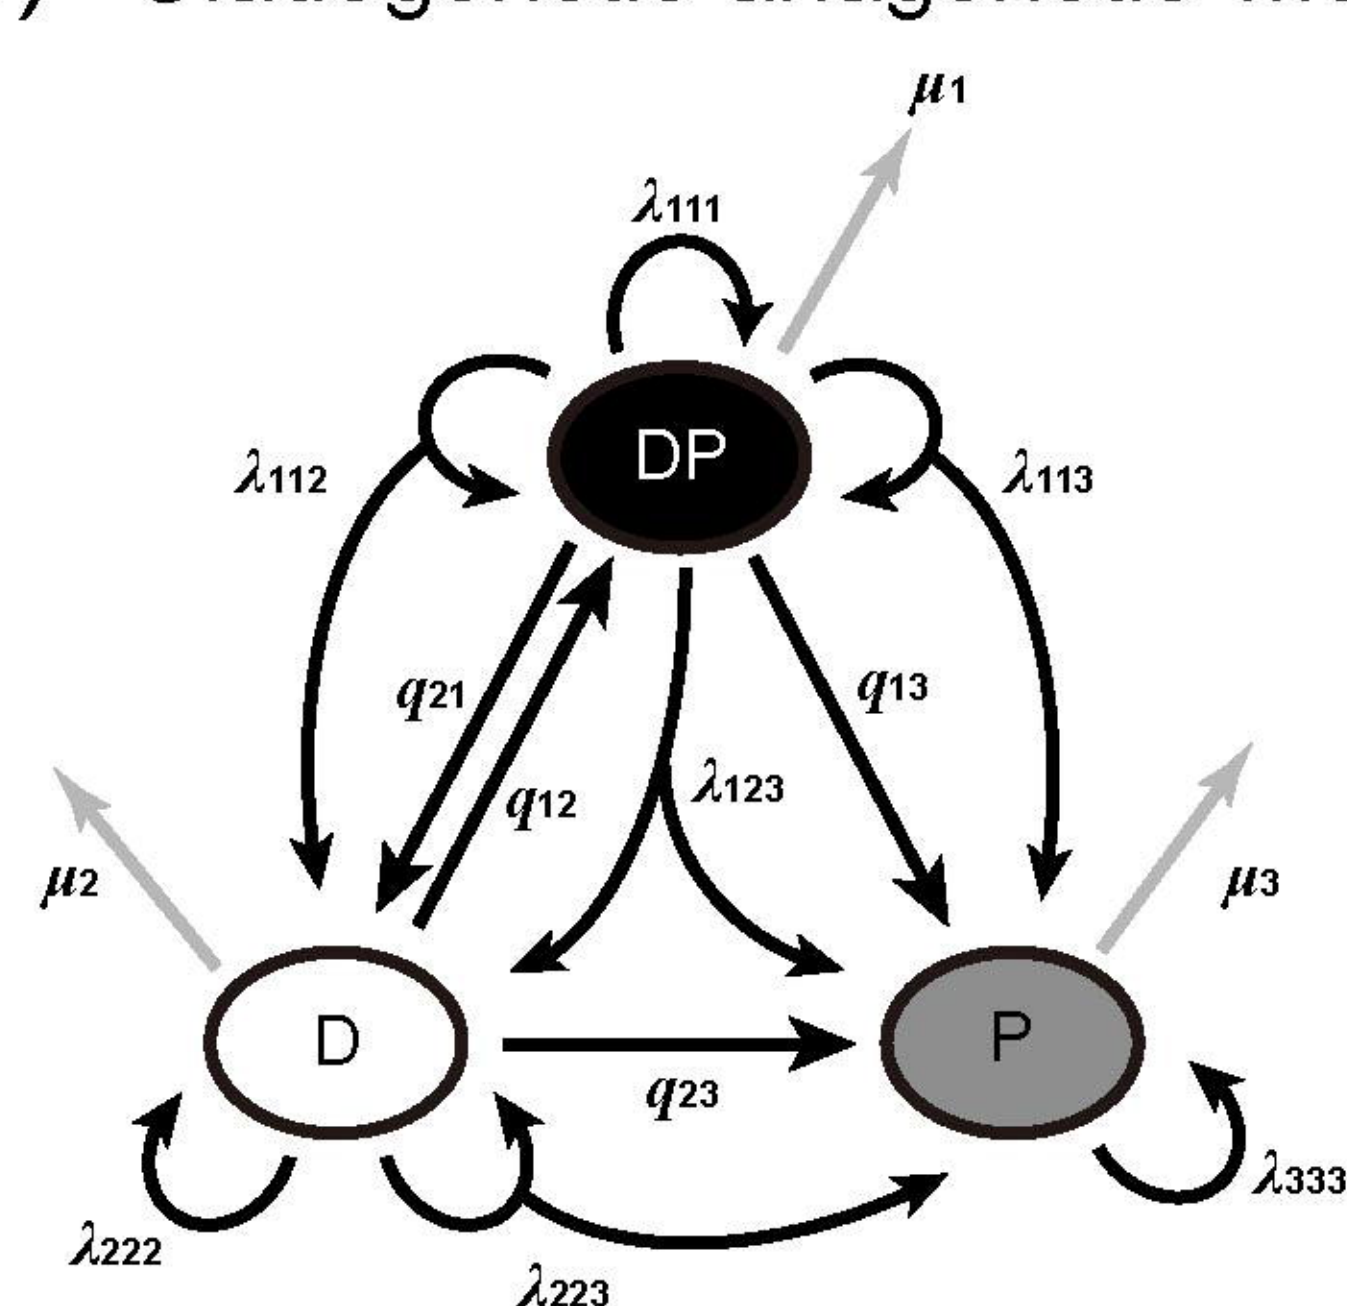

No. of parameters: 12



**(a)**

|   |           |        |           |         |   |   |
|---|-----------|--------|-----------|---------|---|---|
| C | Paleocene | Eocene | Oligocene | Miocene | P | Q |
|---|-----------|--------|-----------|---------|---|---|

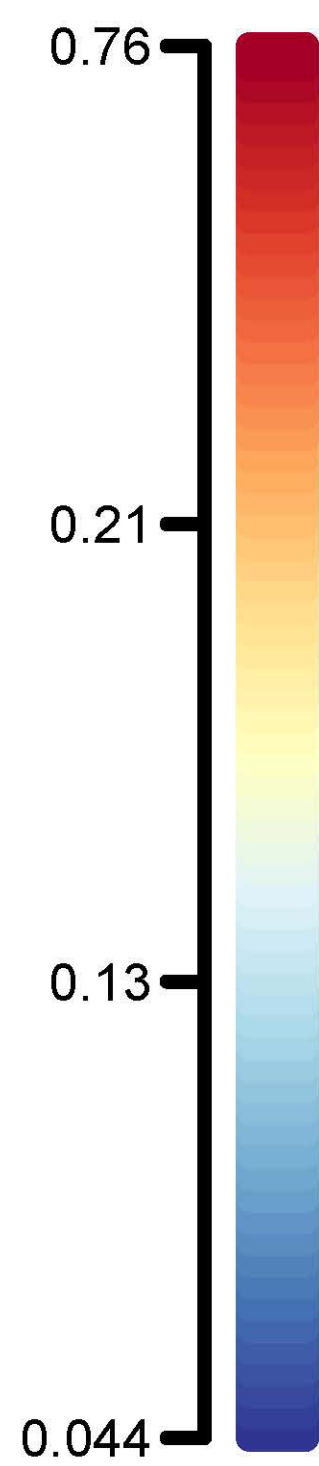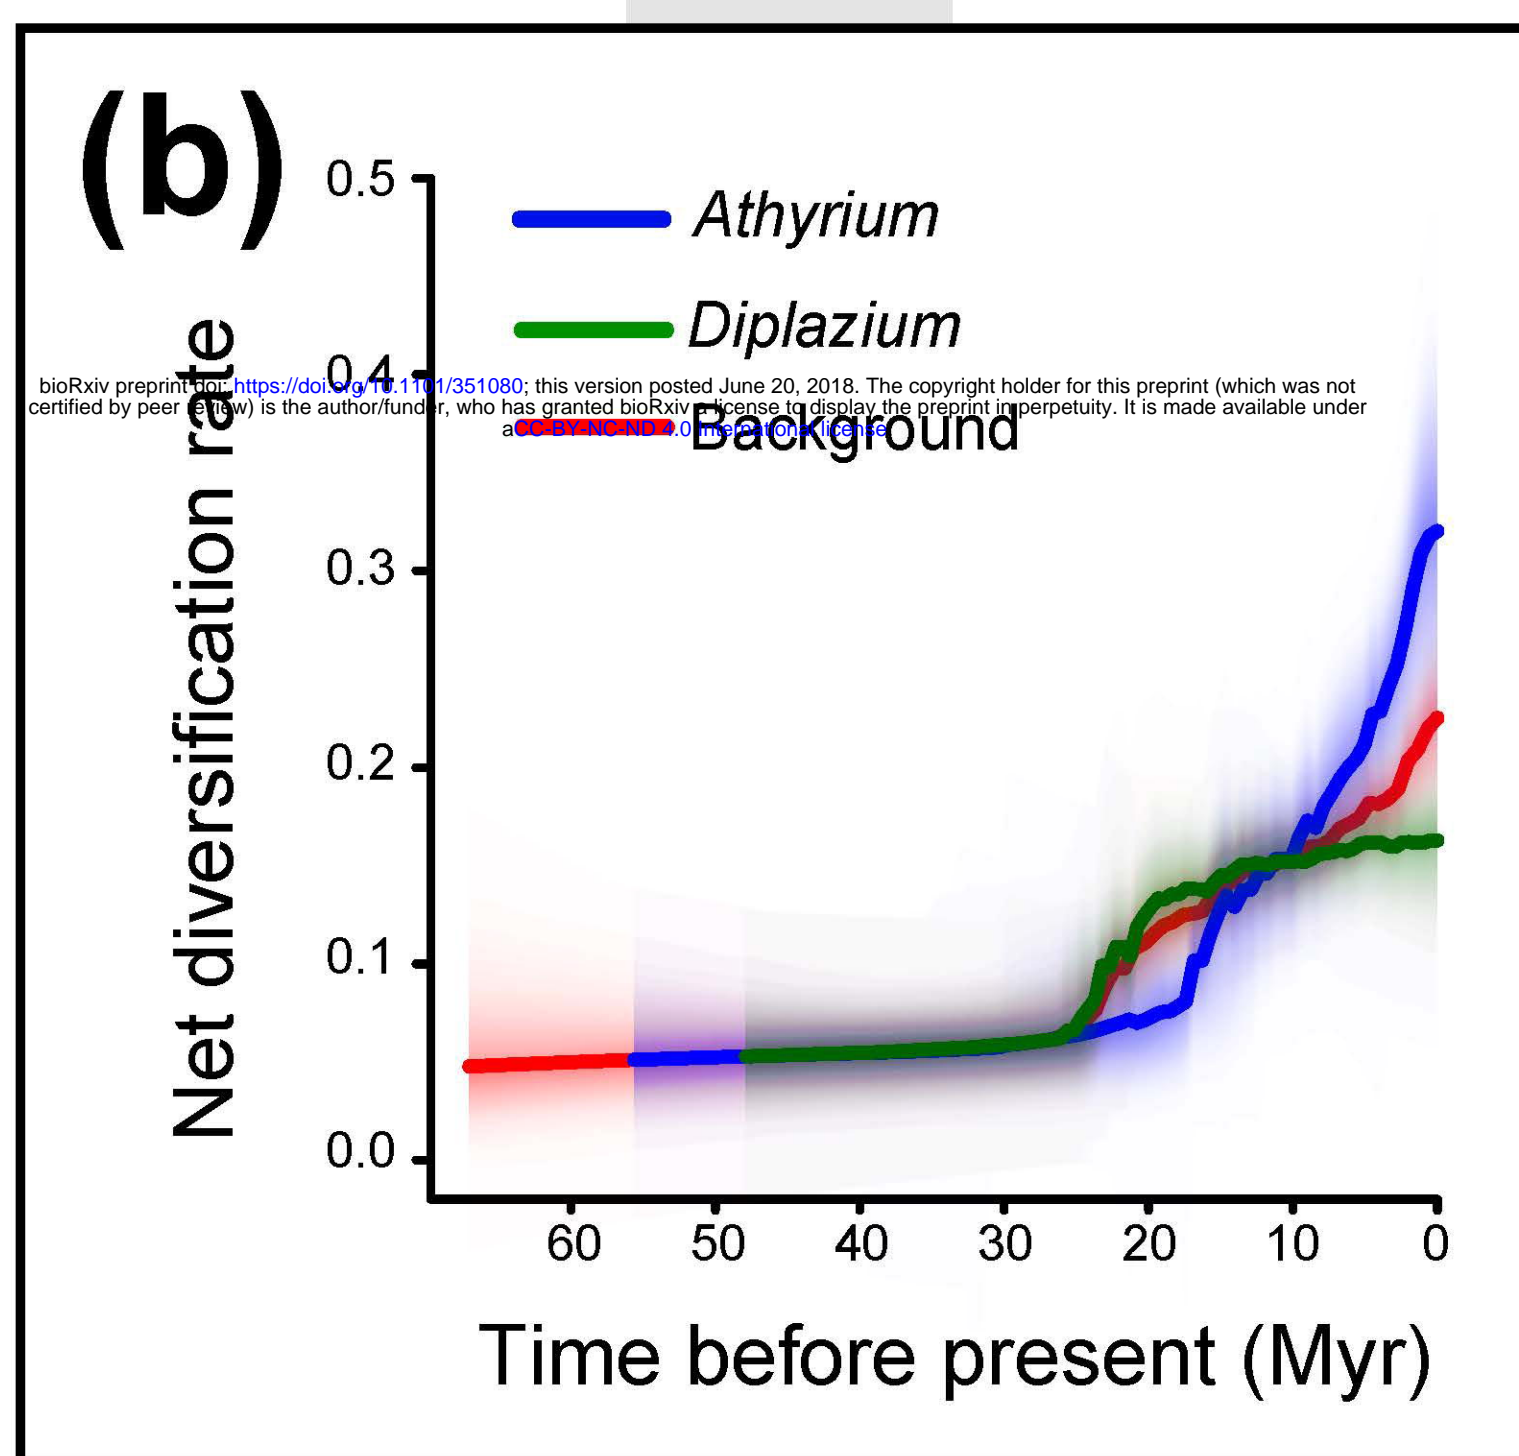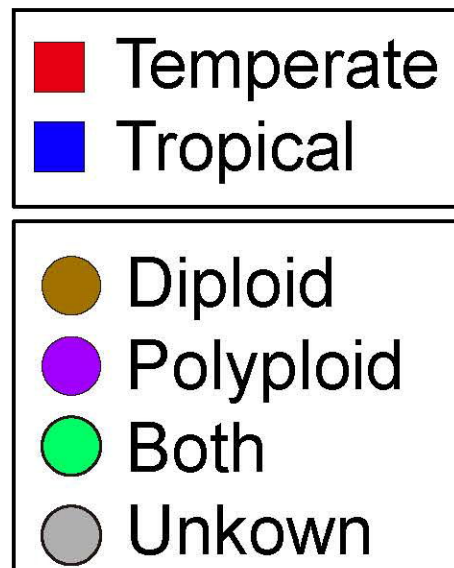

70 60 50 40 30 20 10 0 5 6 7 8 9

Time before present (Myr)  $\log_e$ (Elevation)

0.572

0.486

0.446

Mackinnonia  
cladeCore *Athyrium**Athyrium*Andean *Diplazium*  
cladeSubgenus *Callipteris**Diplazium*



**(a)**

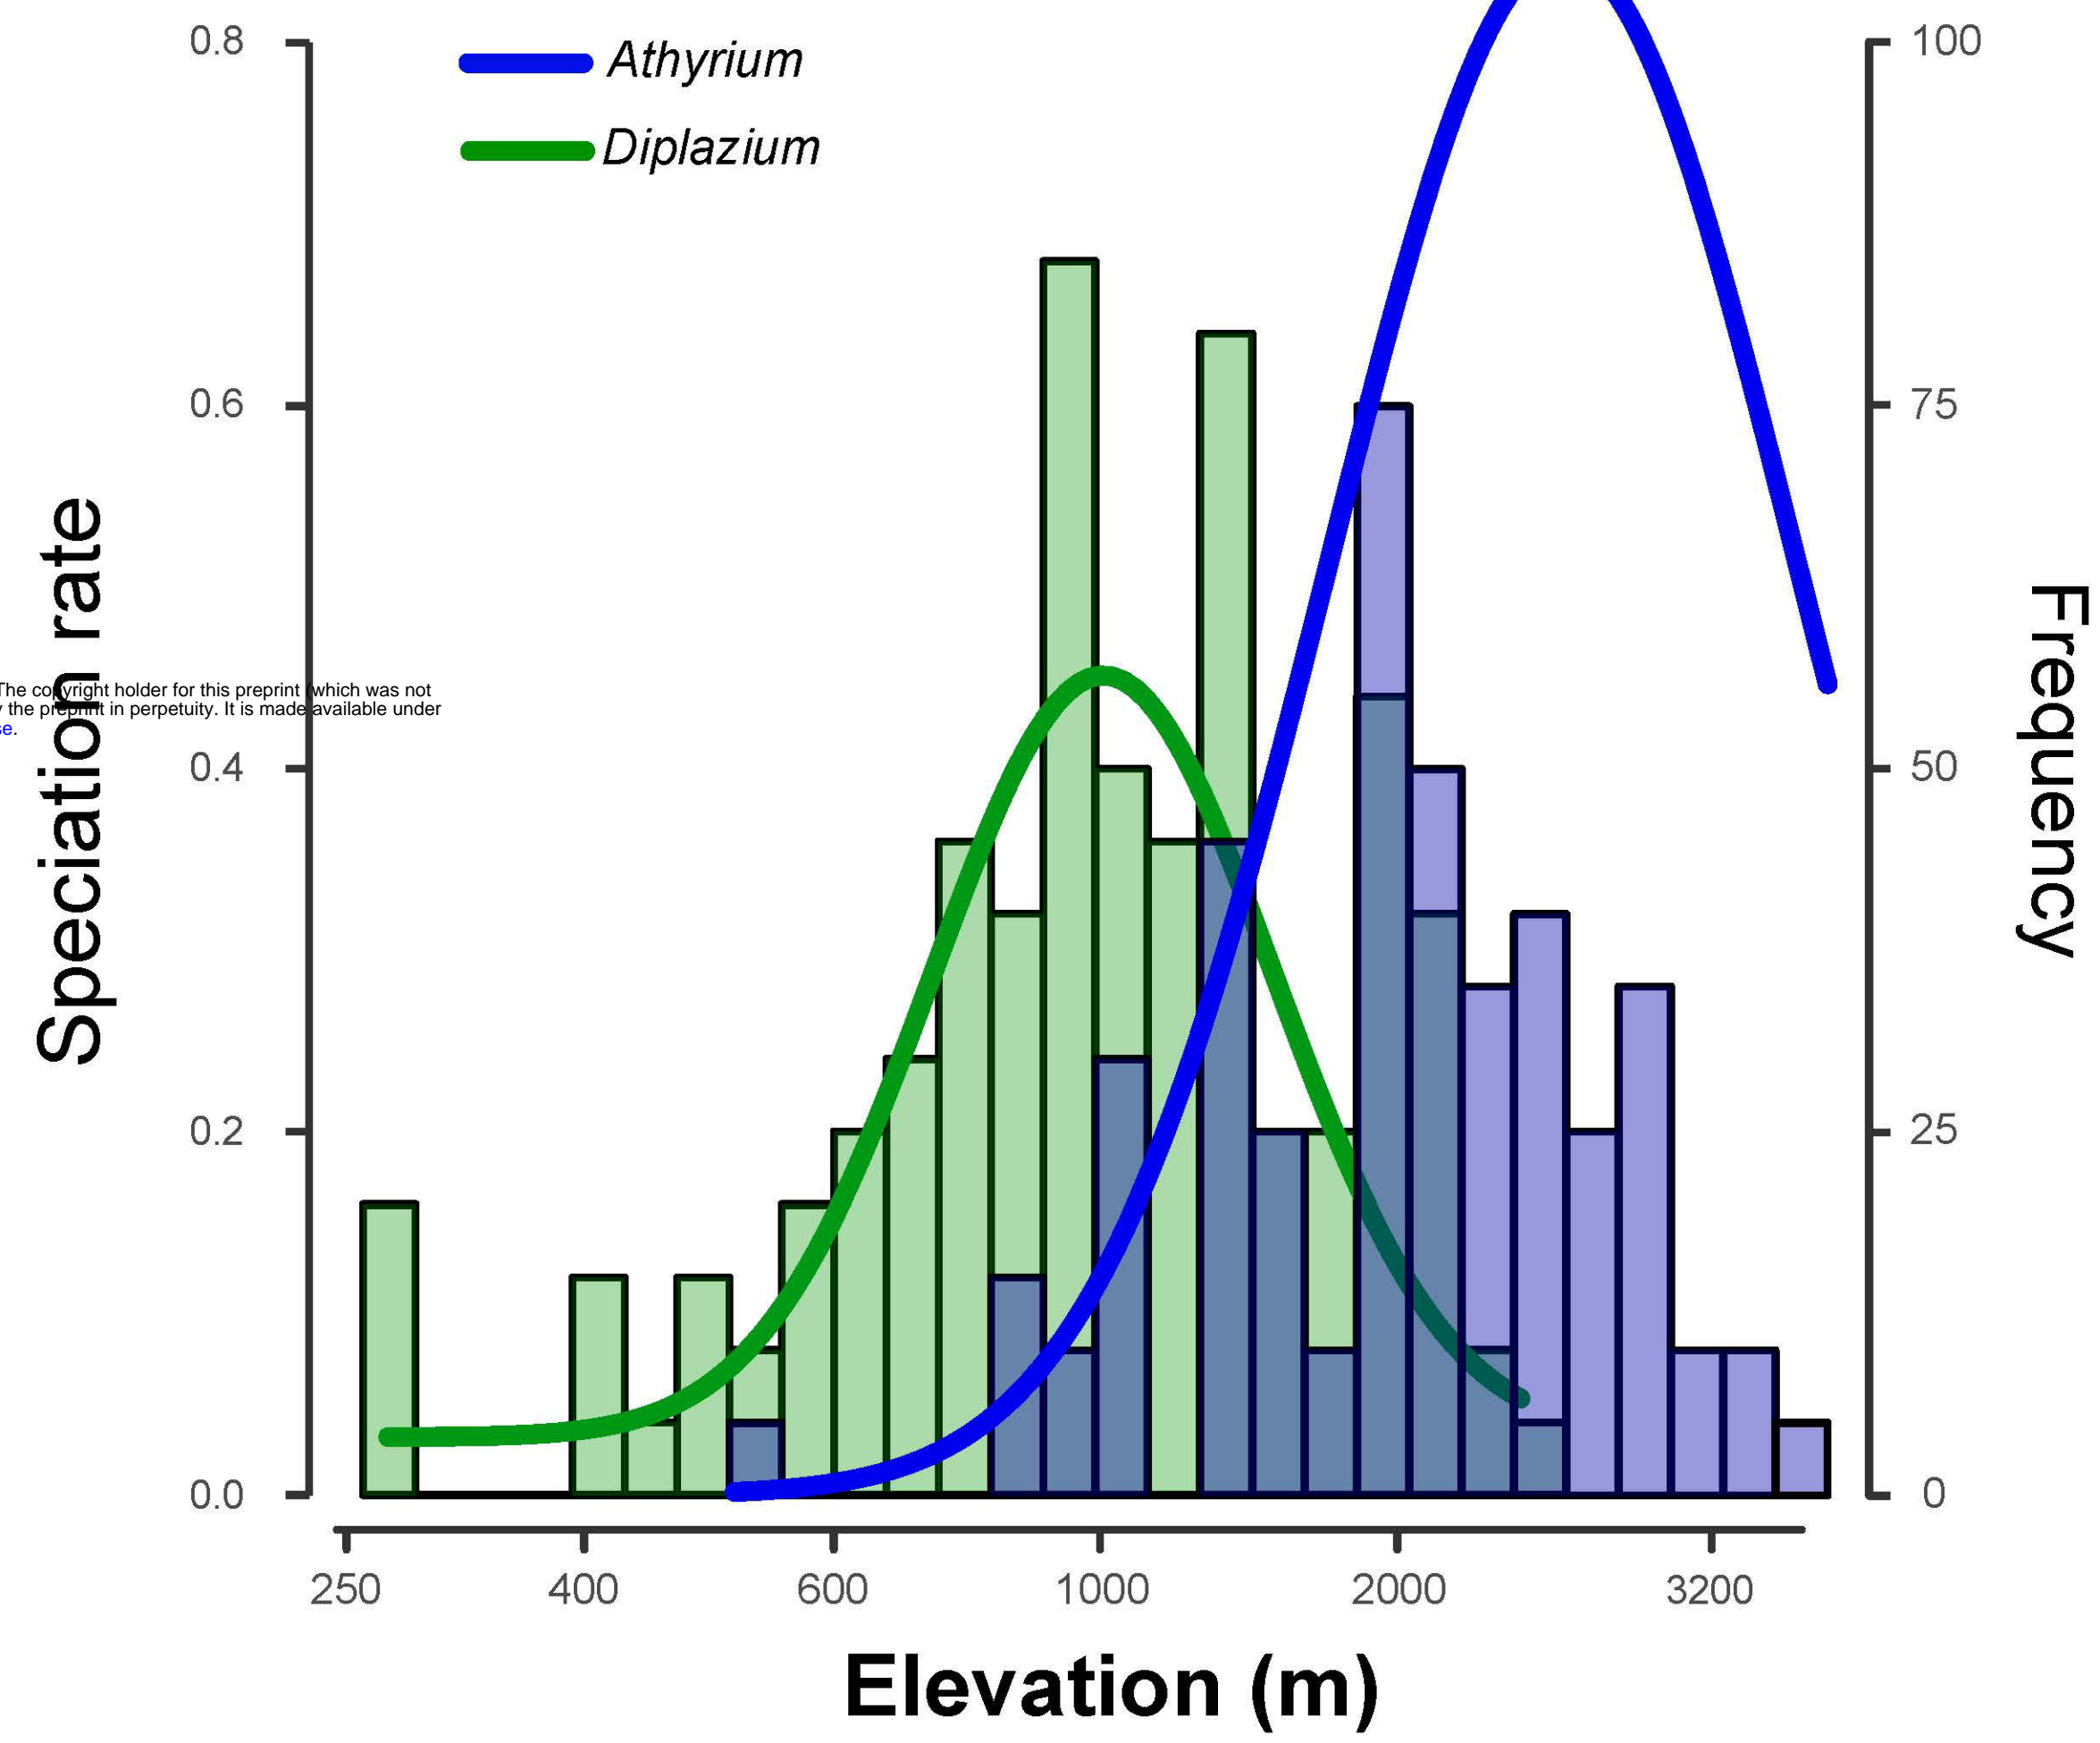

**(b)**

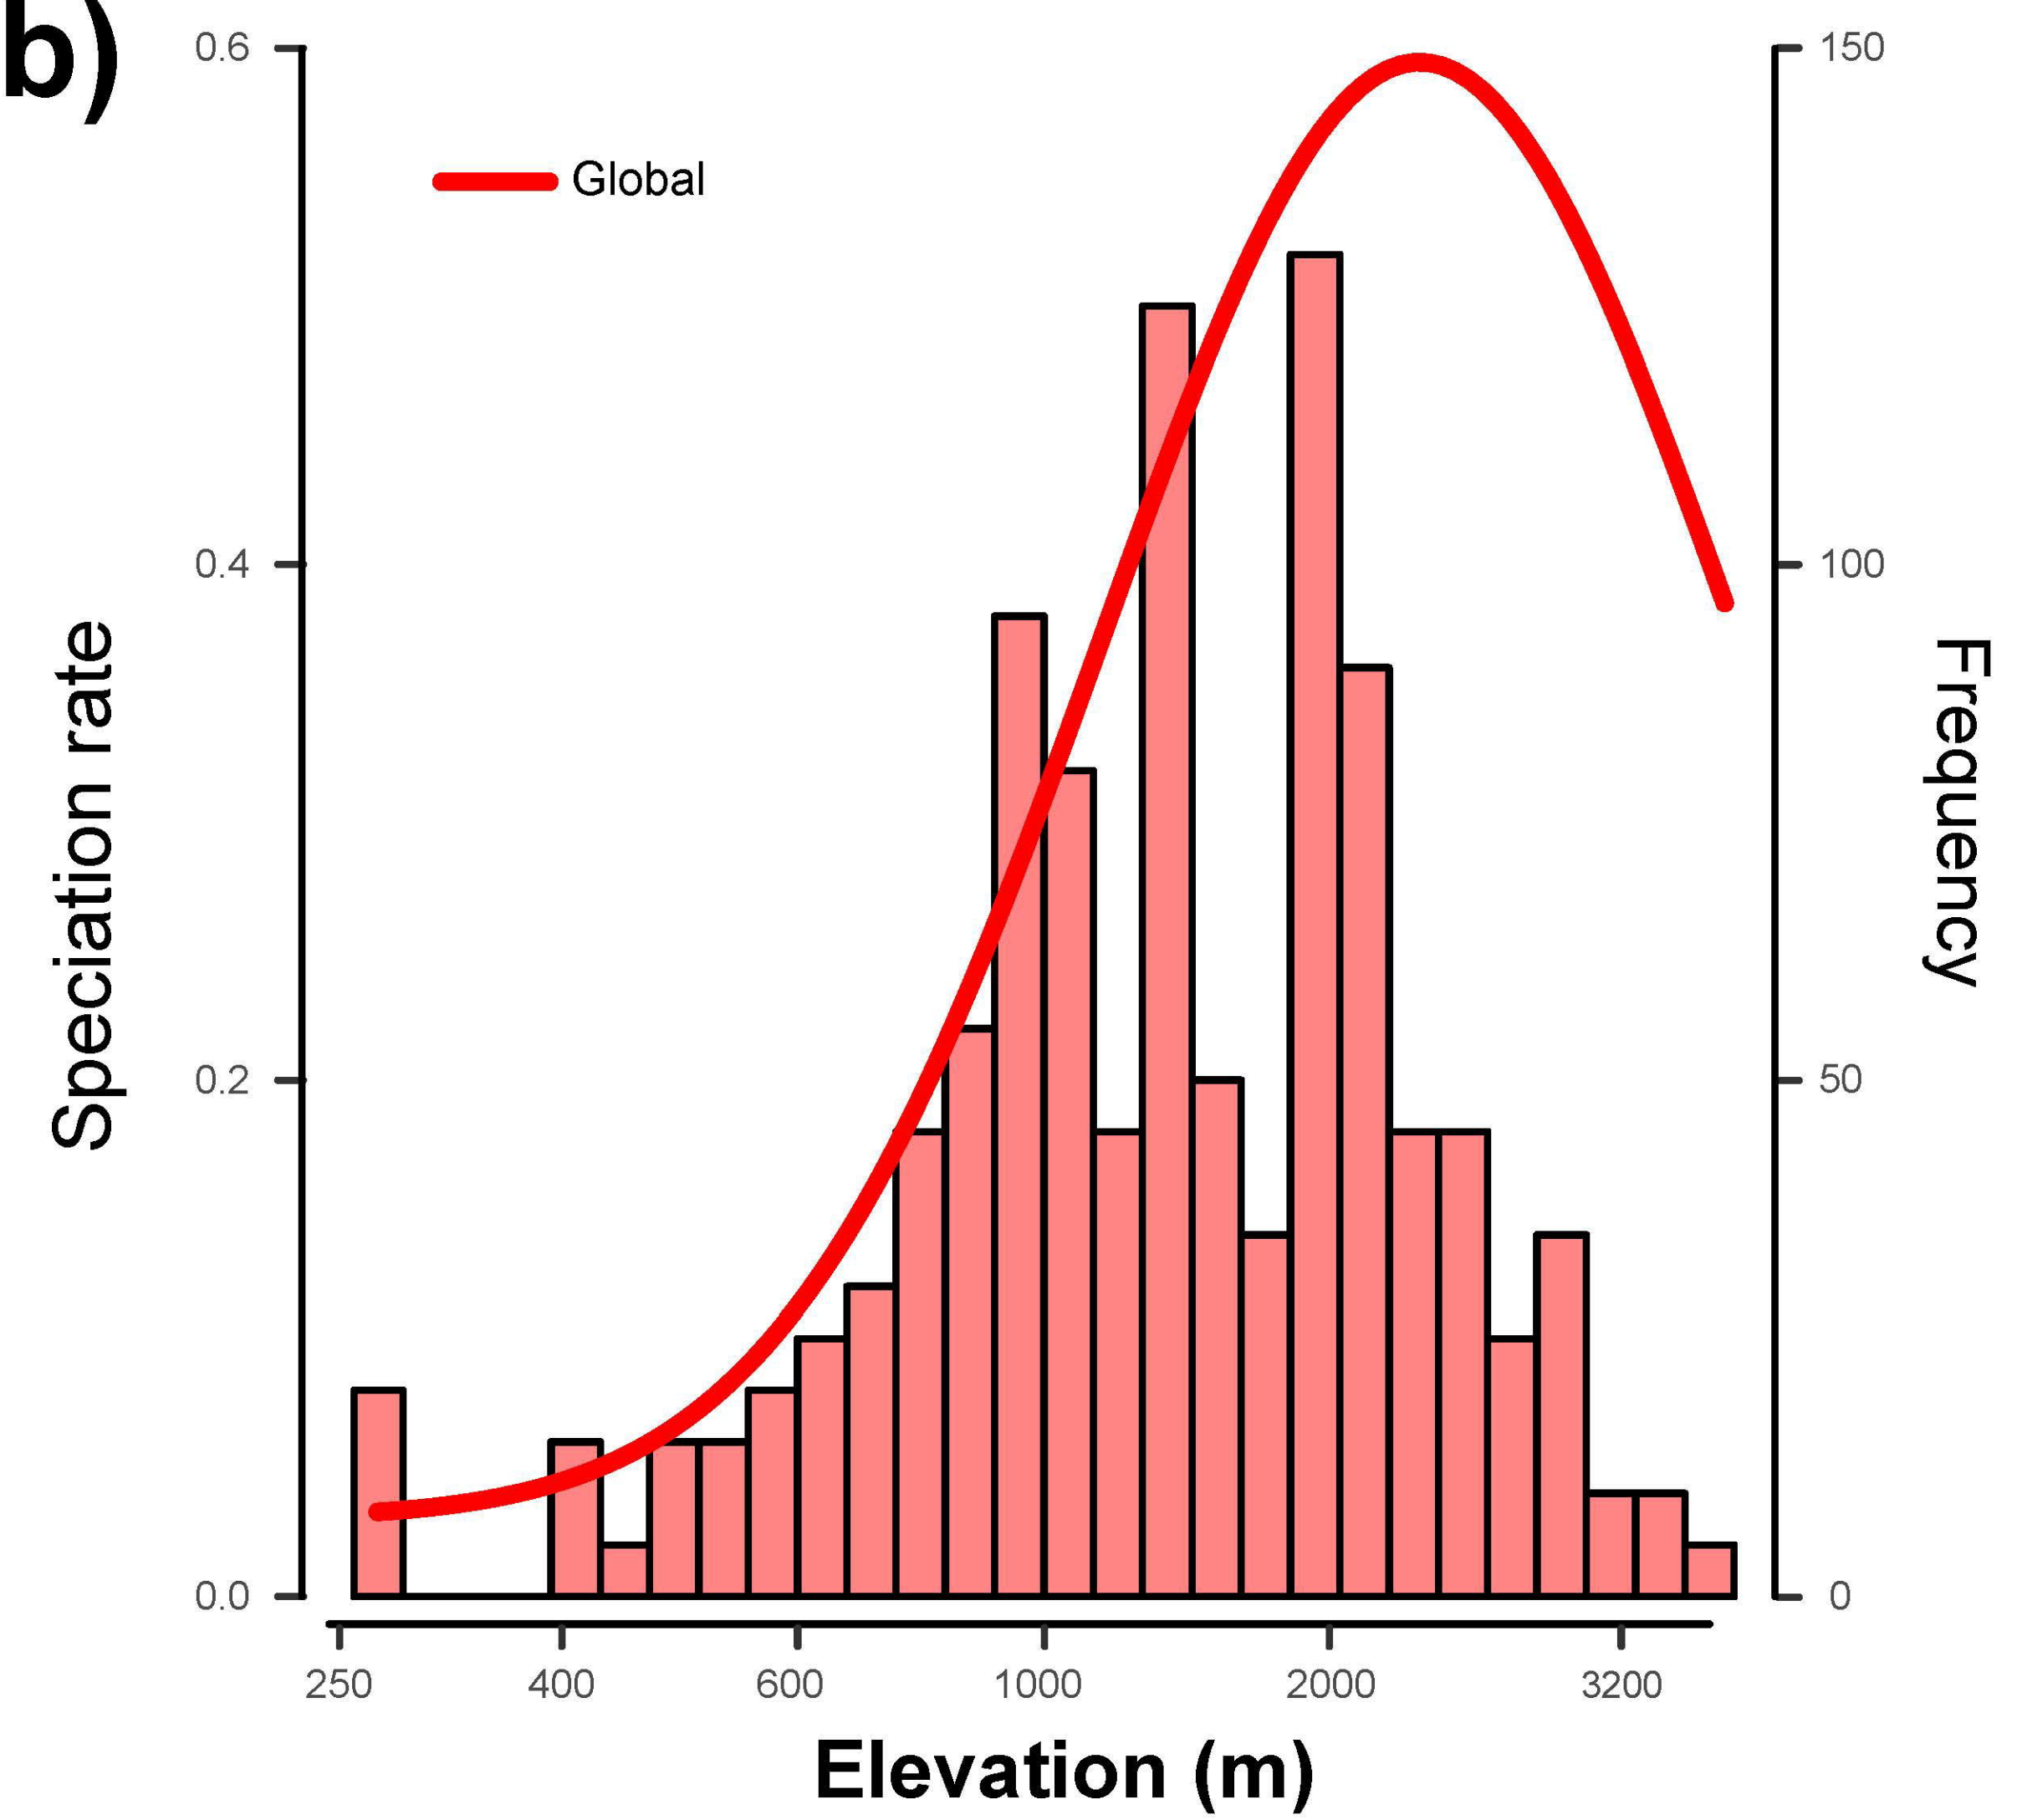

**(a)**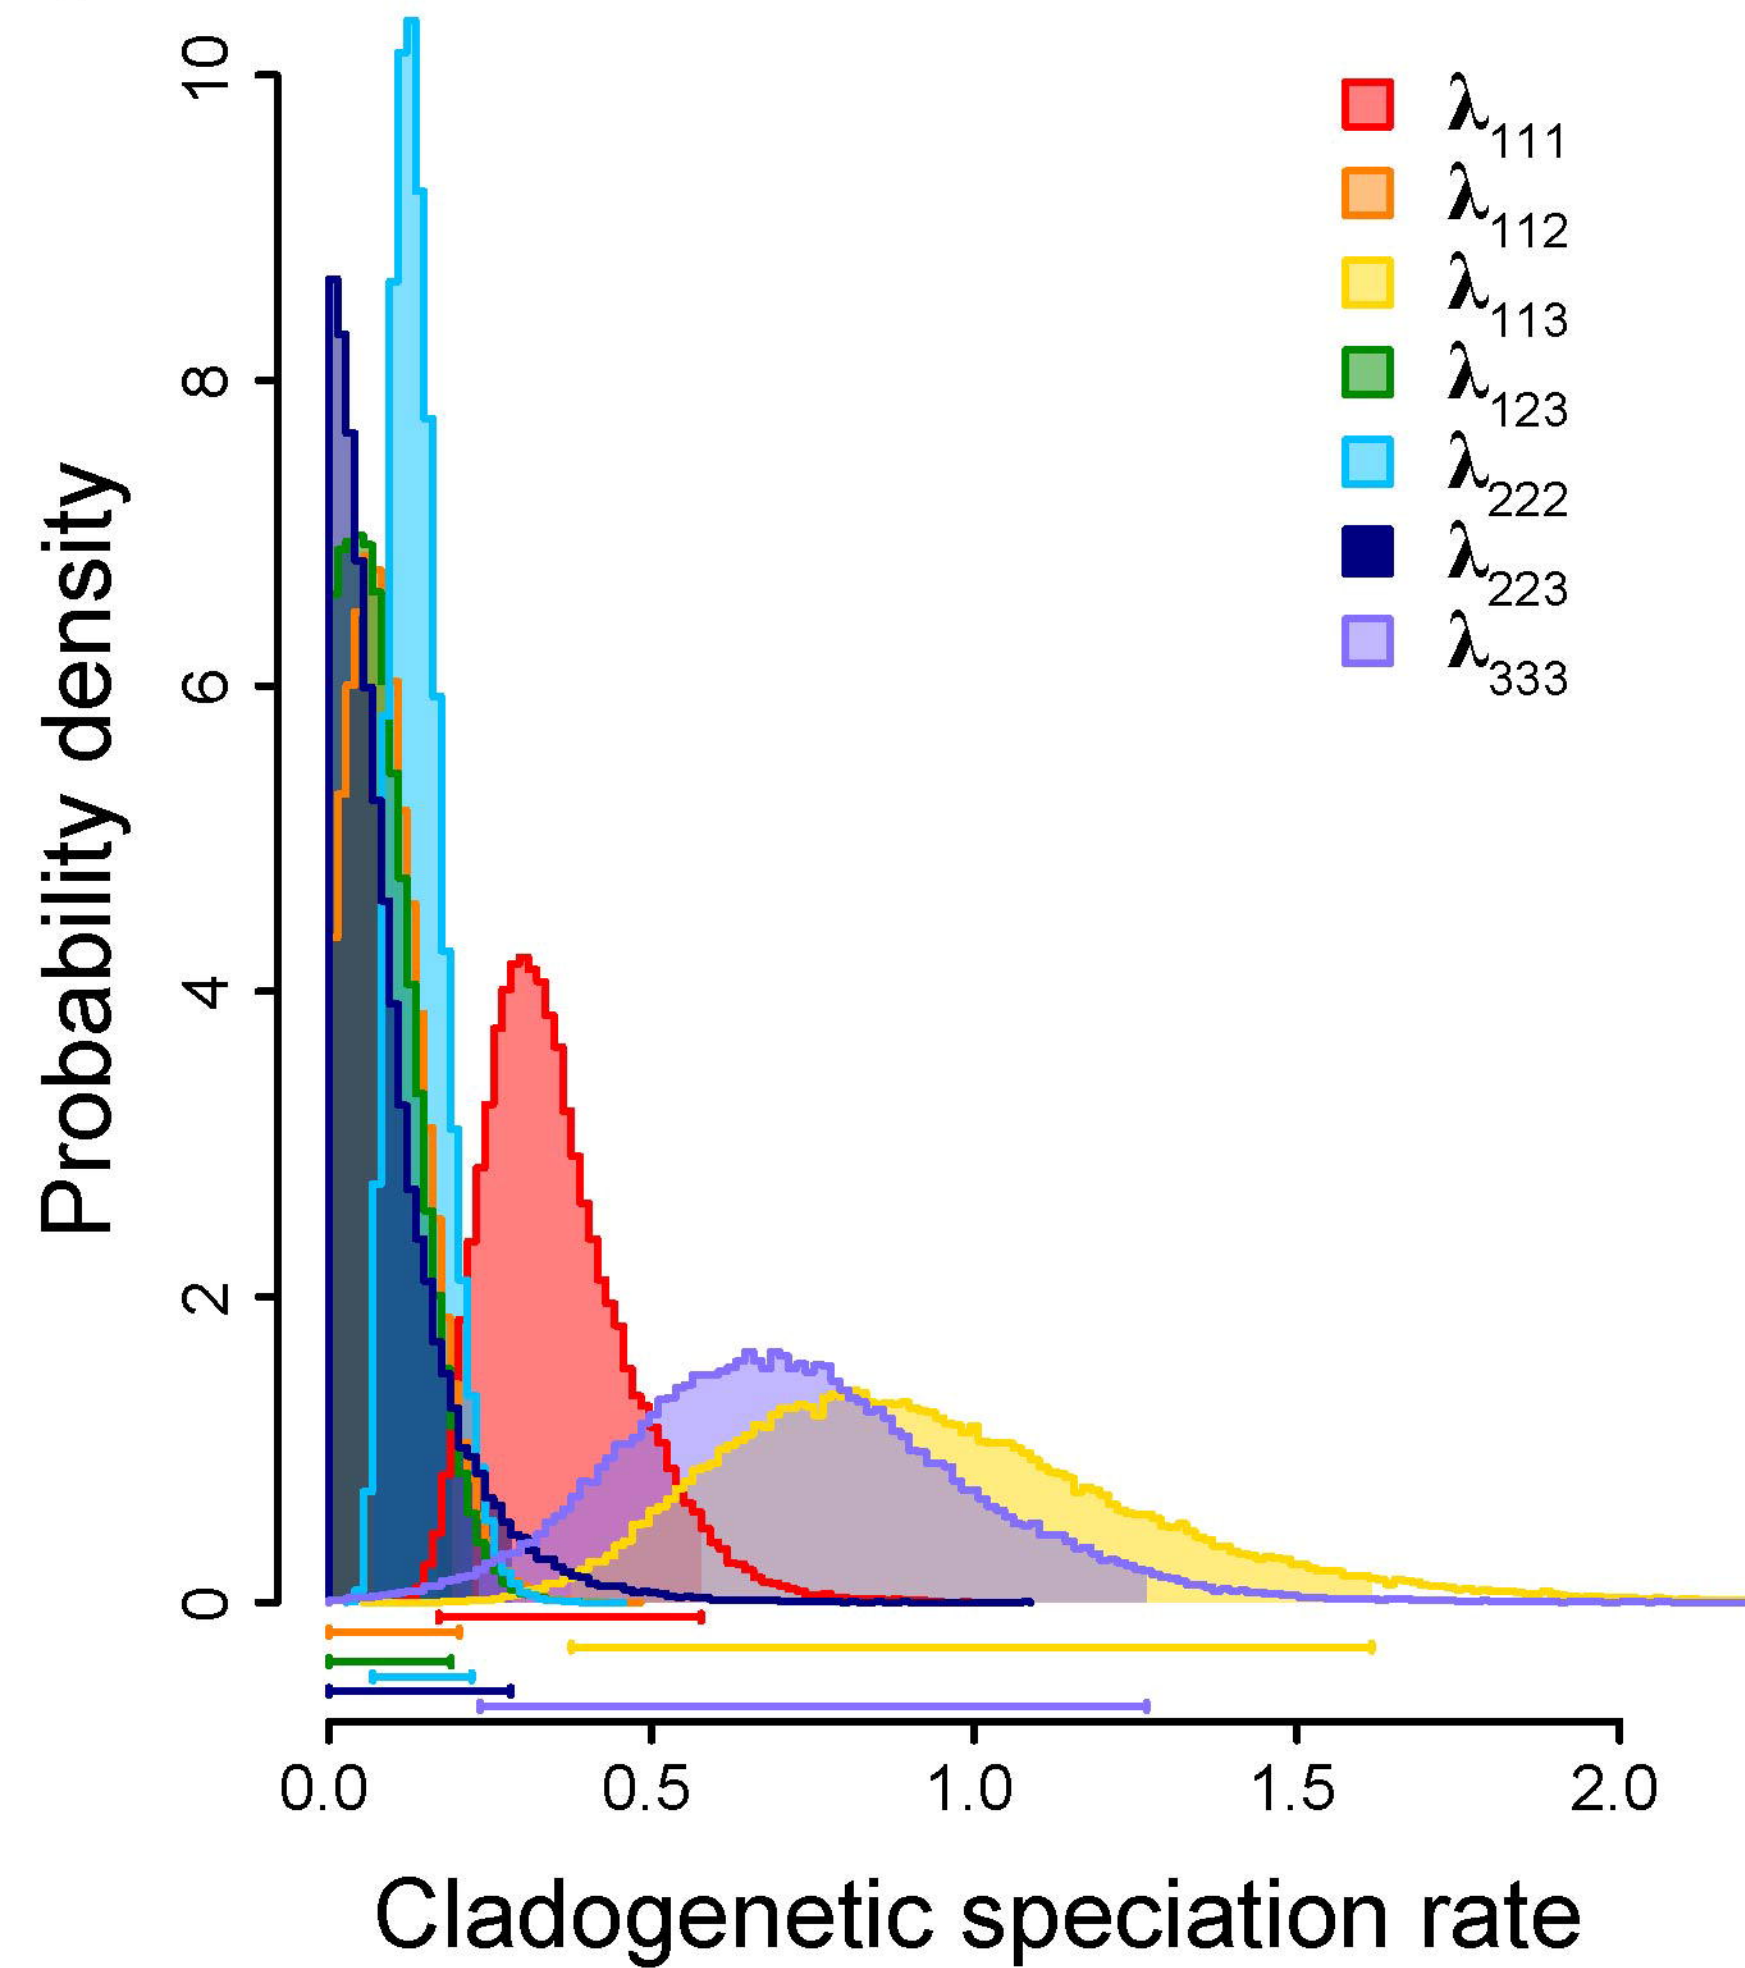**(b)**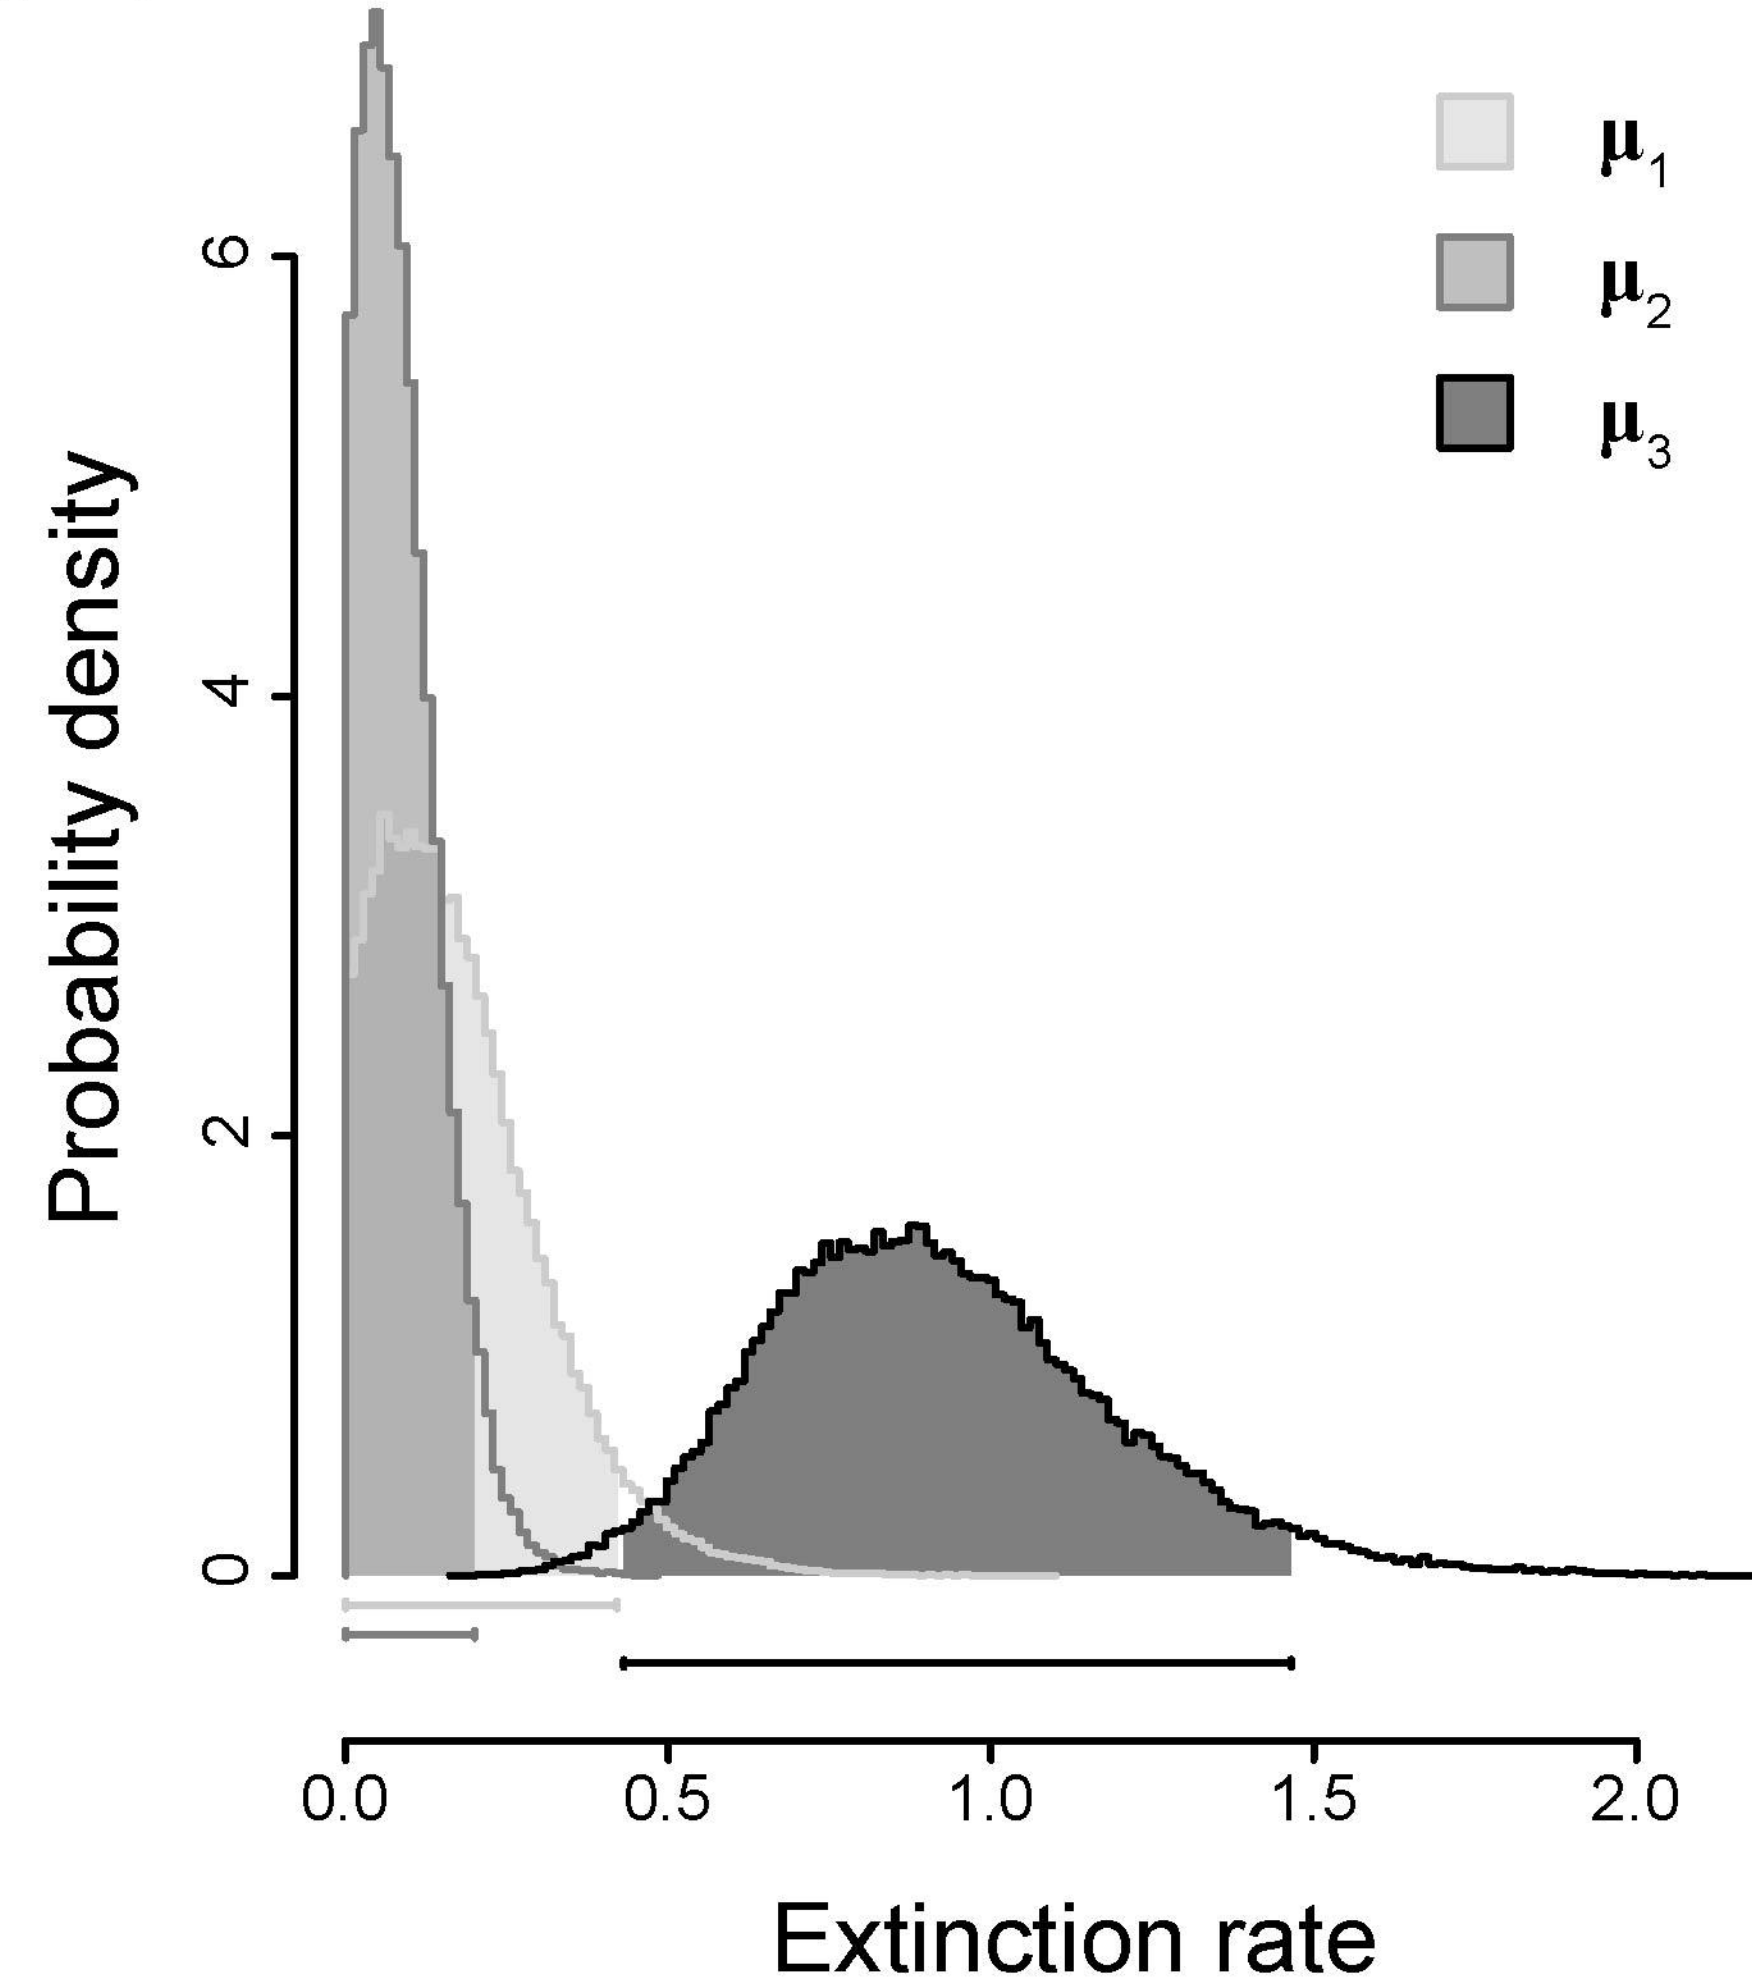**(c)**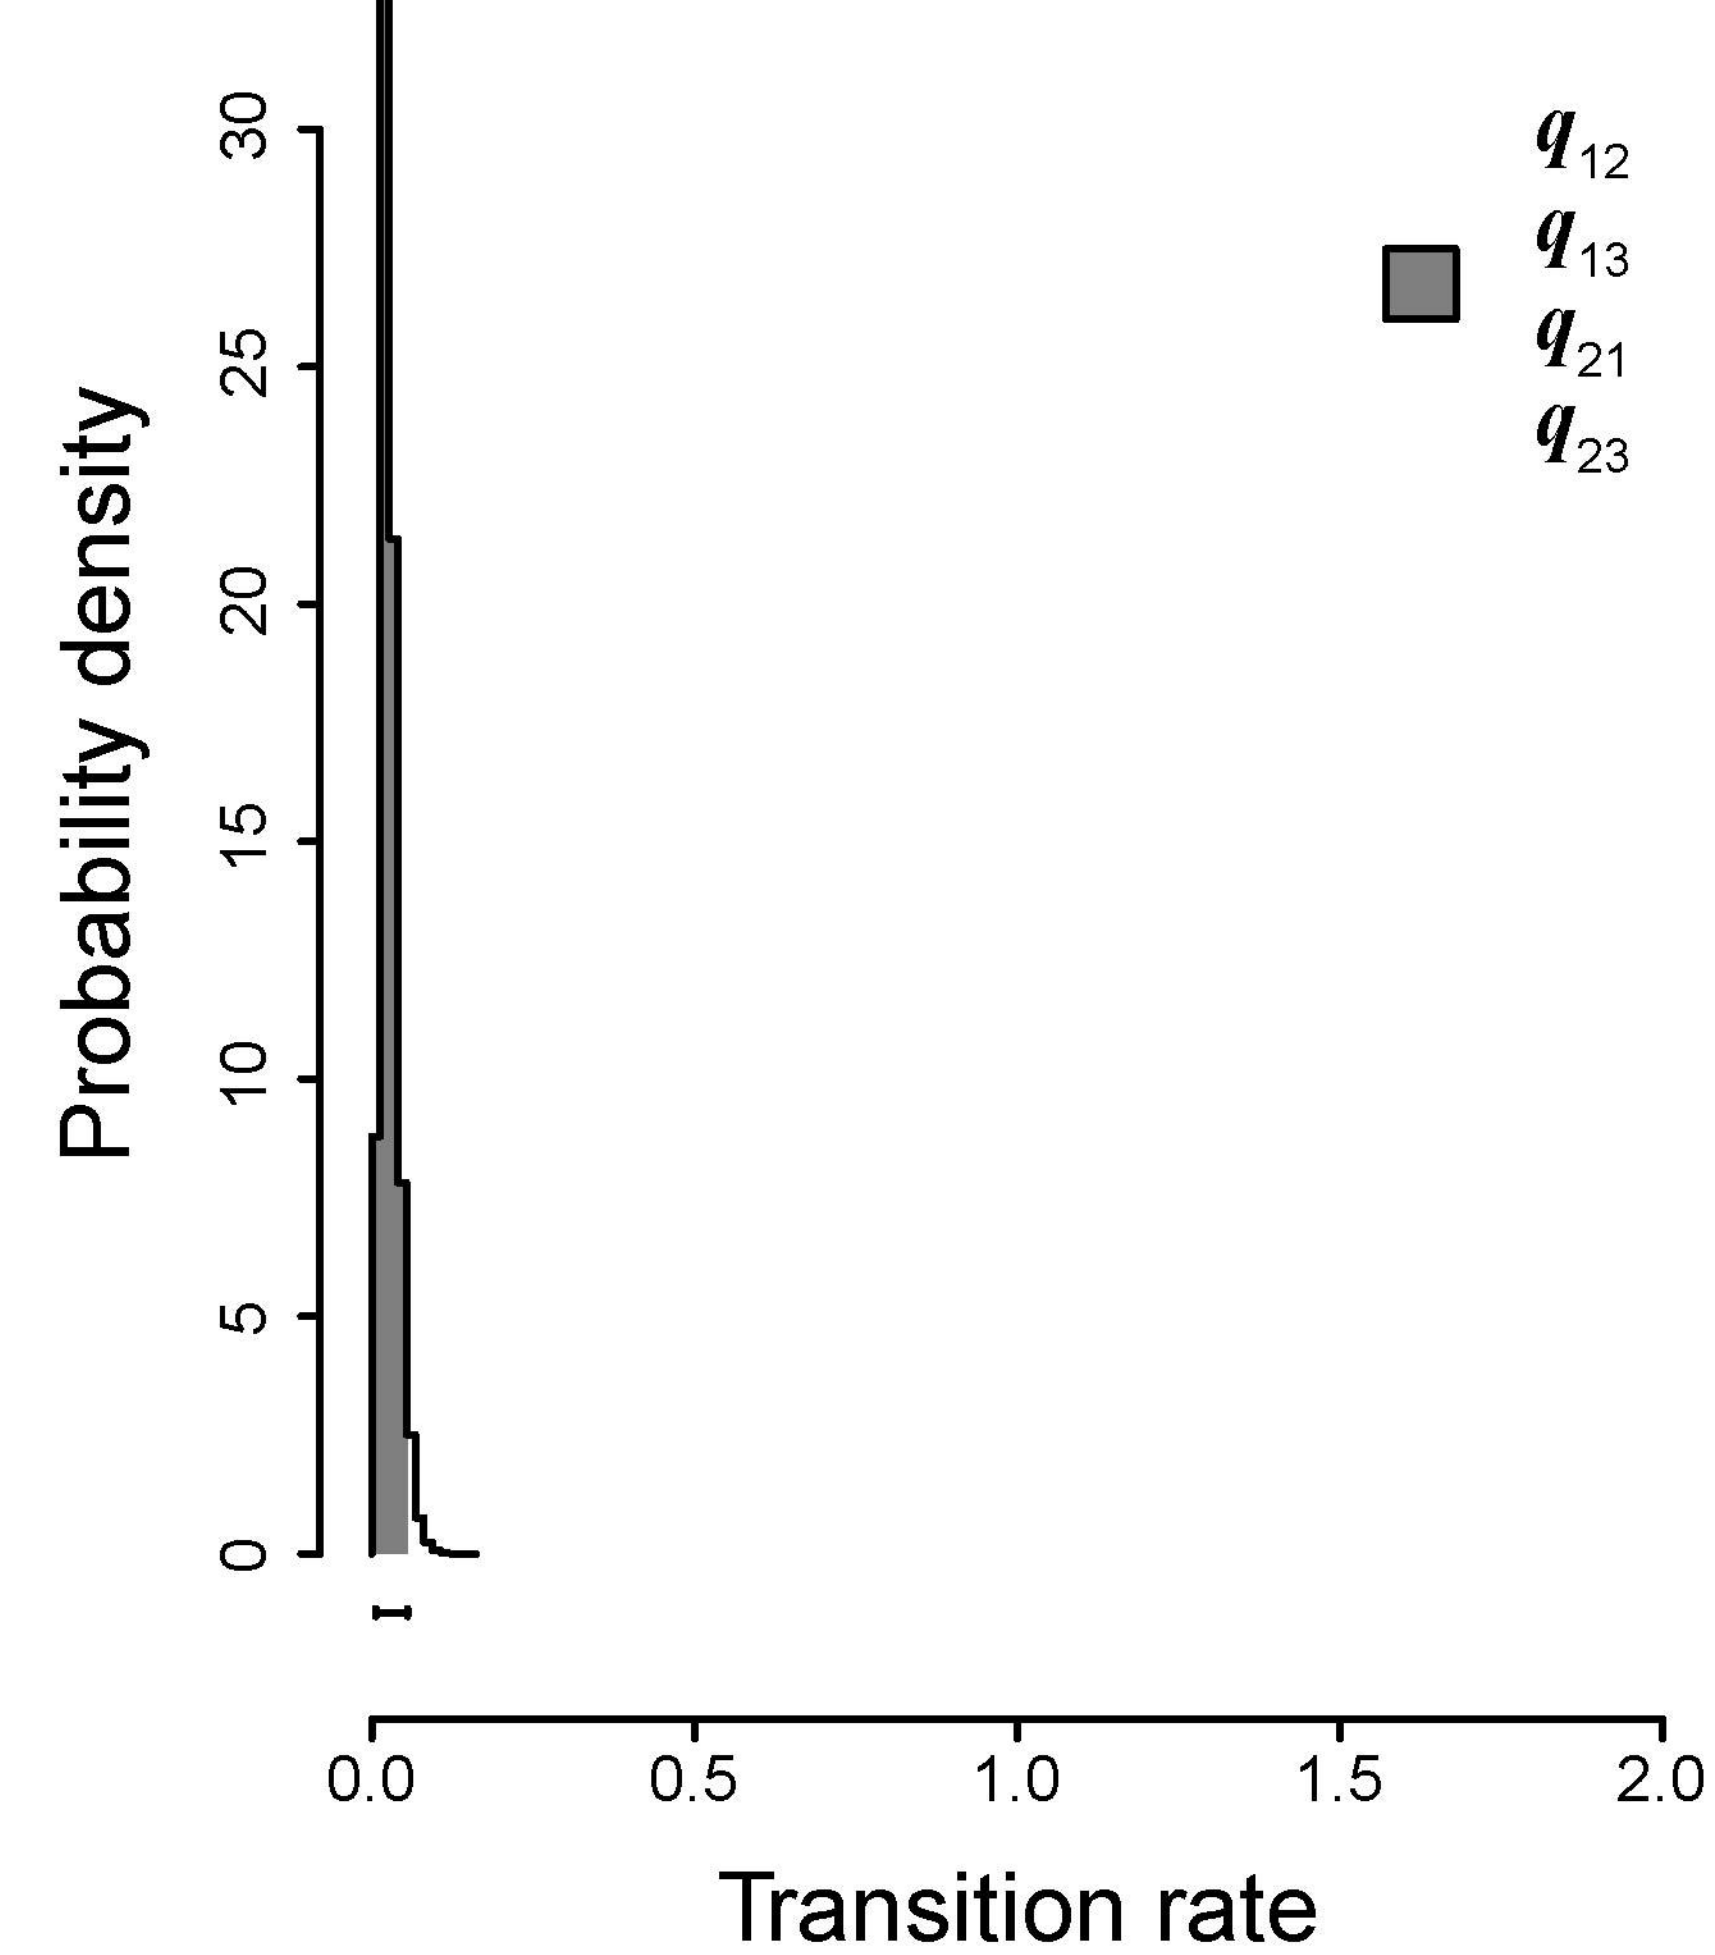**(d)**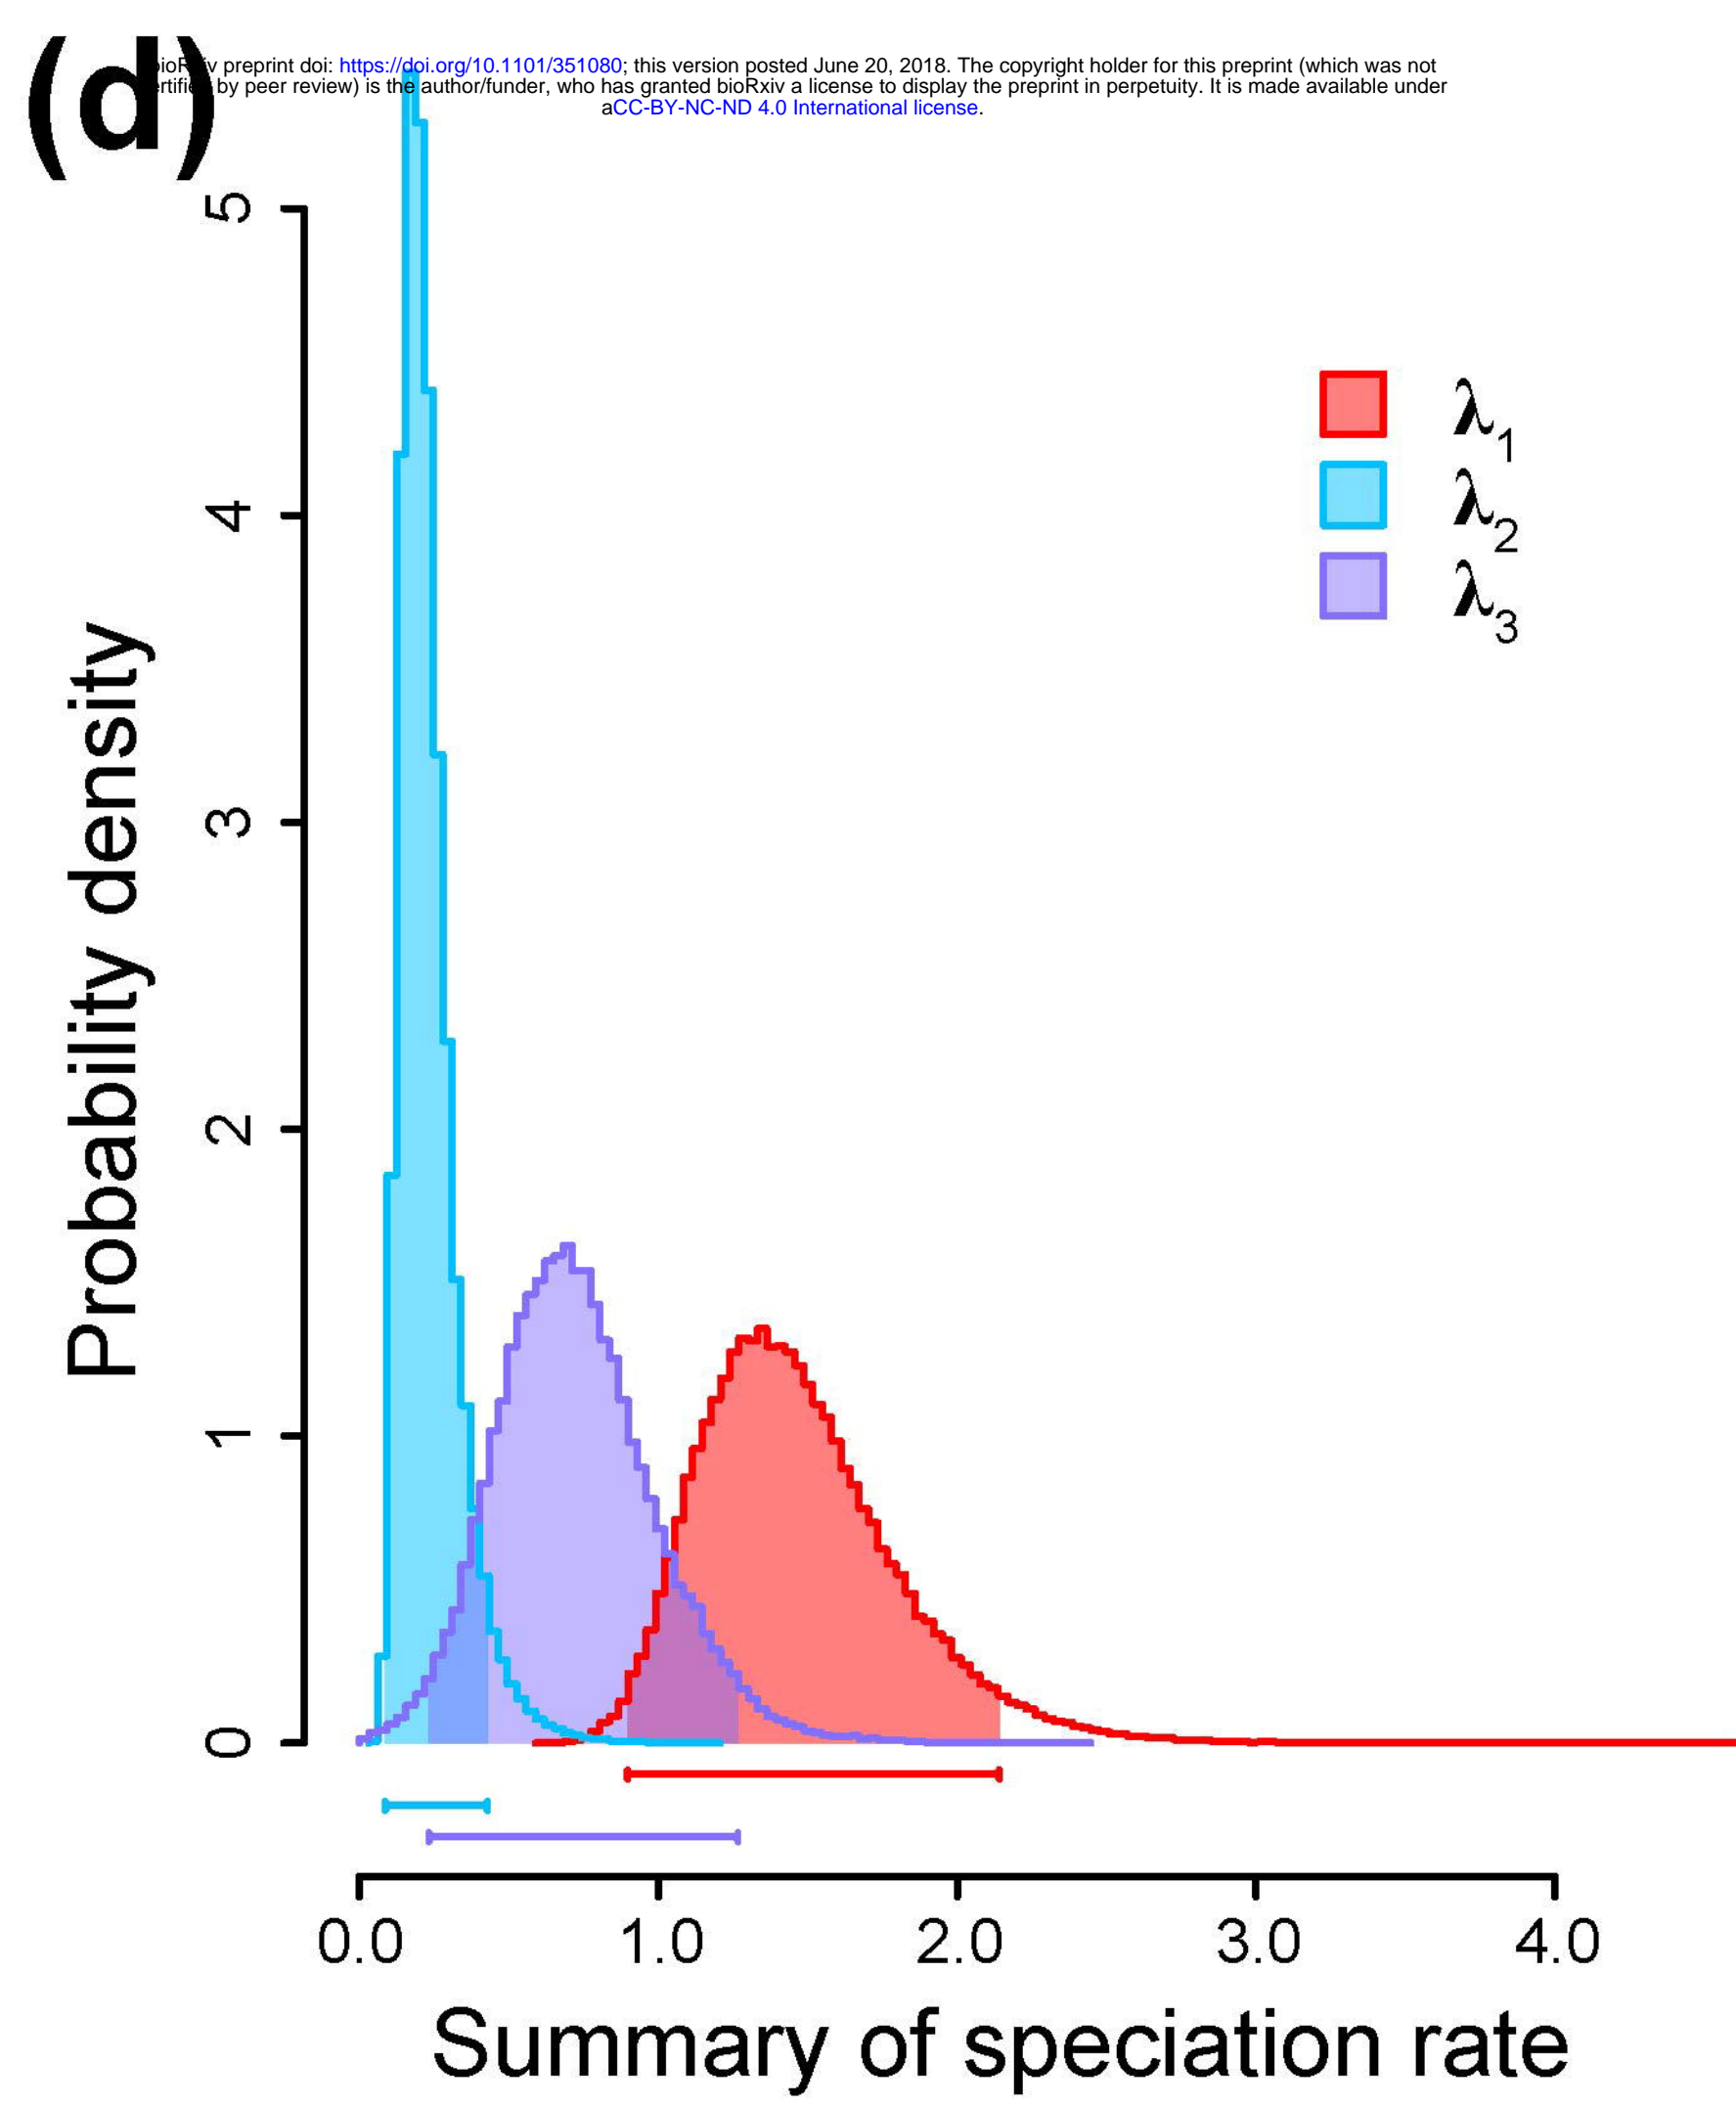**(e)**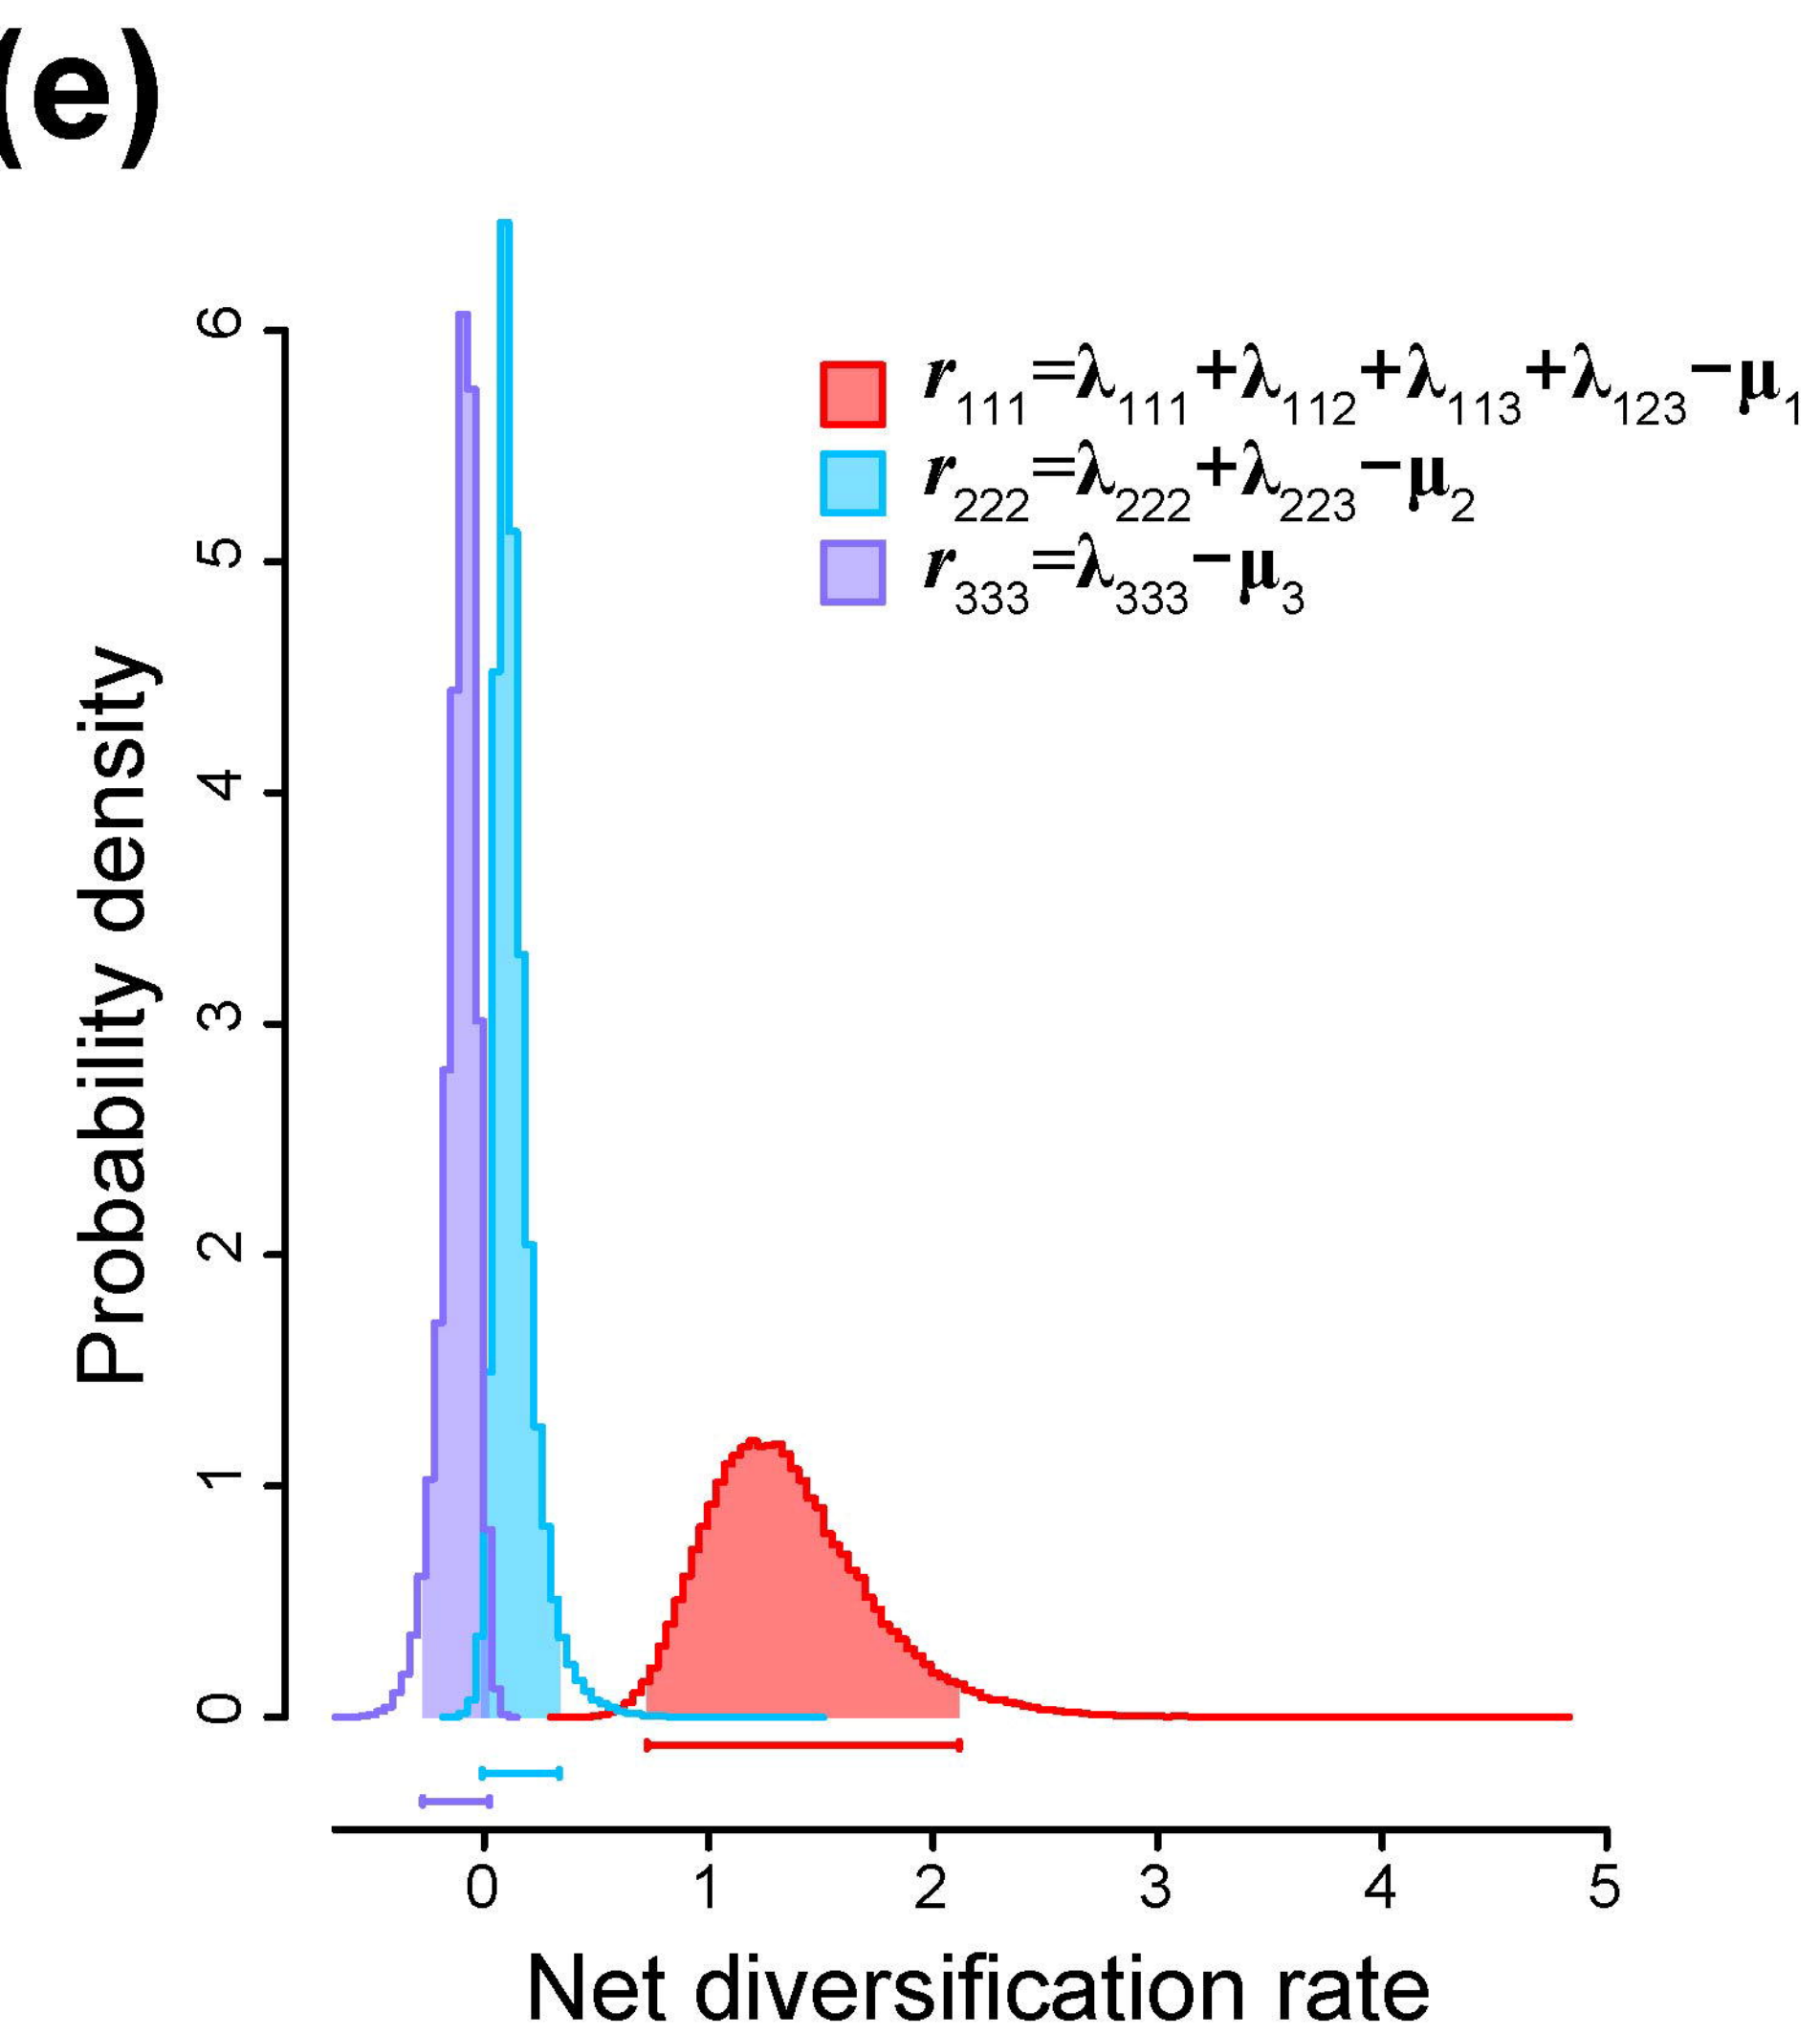**(f)**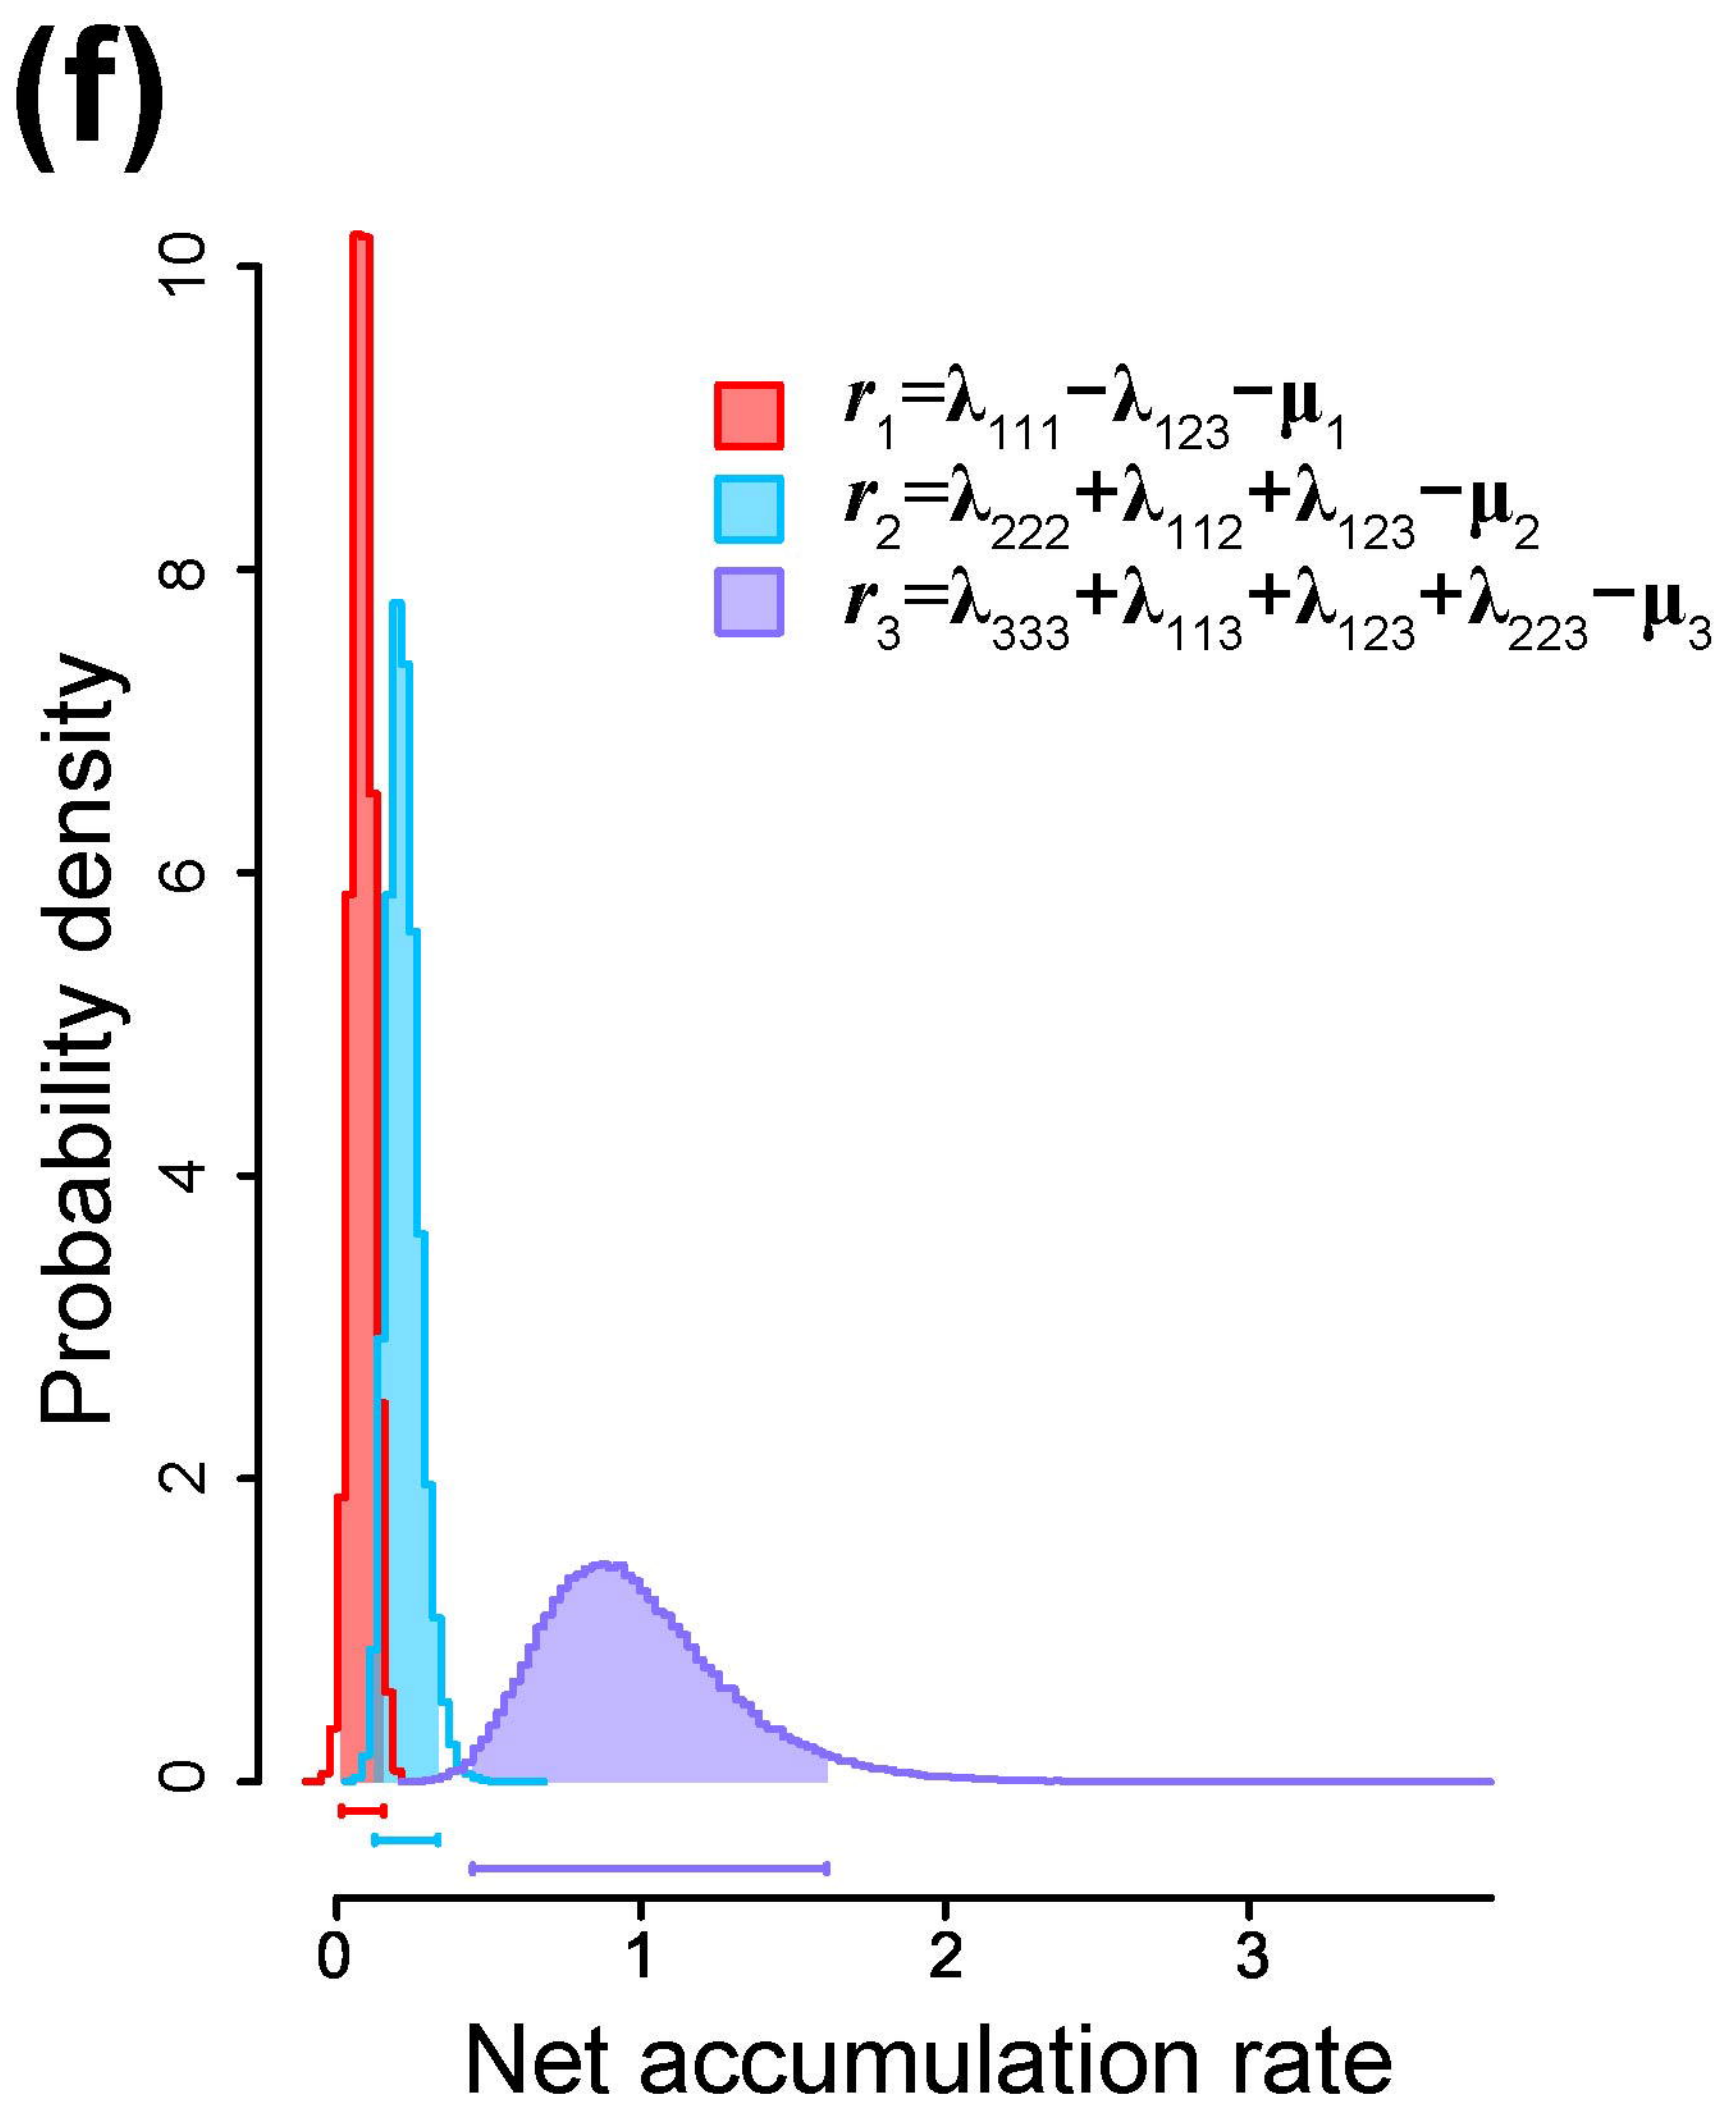

Source: https://www.biorxiv.org/content/10.1101/351080v1.full.pdf
